1 **Specific transcriptomic signatures and dual regulation of steroidogenesis between fetal and**  
2 **adult mouse Leydig cells.**

3  
4 Pauline Sararols<sup>1\*</sup>, Isabelle Stévant<sup>1\*</sup>, Yasmine Neirijnck<sup>1</sup>, Diane Rebourcet<sup>2</sup>, Annalucia Darbey<sup>2</sup>,  
5 Michael K. Curley<sup>3</sup>, Françoise Kühne<sup>1</sup>, Emmanouil Dermitzakis<sup>1,4</sup>, Lee B. Smith<sup>2,3</sup>, Serge Nef<sup>1.#</sup>  
6

7 **Affiliations:**

8 <sup>1</sup> Department of Genetic Medicine and Development, Faculty of Medicine, University of Geneva,  
9 CH-1211 Geneva, Switzerland;

10 <sup>2</sup> College of Engineering, Science and Environment, University of Newcastle, Callaghan, New  
11 South Wales 2308, Australia.

12 <sup>3</sup> Medical Research Council Centre for Reproductive Health, The Queen's Medical Research  
13 Institute, University of Edinburgh, Edinburgh EH16 4TJ, United Kingdom.

14 <sup>4</sup> Institute of Genetics and Genomics of Geneva (iGE3), Faculty of Medicine, Geneva, CH-1211  
15 Geneva, Switzerland

16 \* These authors share first authorship

17 #Correspondence to: [Serge.Nef@unige.ch](mailto:Serge.Nef@unige.ch)

18  
19 **Keywords:** fetal Leydig cell, adult Leydig cell, androgen, testis, RNA sequencing, single cell RNA  
20 sequencing  
21

22 **Disclosure statement:** The authors declare no conflicts of interest.

23 **Funding sources:** This work was supported by the Swiss National Science Foundation (Grant  
24 31003A\_152636 to S.N.); and the Département de l'Instruction Publique of the State of Geneva (to  
25 S.N.). Department of Health | National Health and Medical Research Council (NHMRC),  
26 Grant/Award Number: APP1158344 (to L.S. & D.R.).

27 **Abstract**

28 **Leydig cells (LC) are the main testicular androgen-producing cells. In eutherian mammals,**  
29 **two types of LCs emerge successively during testicular development, fetal Leydig cells (FLCs)**  
30 **and adult Leydig cells (ALCs). Both display significant differences in androgen production**  
31 **and regulation. Using bulk RNA sequencing, we compared the transcriptomes of both LC**  
32 **populations to characterise their specific transcriptional and functional features. Despite**  
33 **similar transcriptomic profiles, a quarter of the genes show significant variations in**  
34 **expression between FLCs and ALCs. Non-transcriptional events, such as alternative splicing**  
35 **was also observed, including a high rate of intron retention in FLCs compared to ALCs. The**  
36 **use of single-cell RNA sequencing data also allowed the identification of nine FLC-specific**  
37 **genes and 50 ALC-specific genes. Expression of the corticotropin-releasing hormone 1**  
38 **(*Crhrl*) receptor and the ACTH receptor melanocortin type 2 receptor (*Mc2r*) specifically in**  
39 **FLCs suggests a dual regulation of steroidogenesis. The androstenedione synthesis by FLCs**  
40 **is stimulated by luteinizing hormone (LH), CRH and ACTH whereas the testosterone**  
41 **synthesis by ALCs is dependent exclusively on LH. Overall, our study provides a useful**  
42 **database to explore LC development and function.**

## 43 **Introduction**

44 Leydig cells (LC) are the main steroidogenic cells of the testes. They synthesise androgens that are  
45 essential for both masculinisation of the organism and spermatogenesis. In mice, two populations  
46 of Leydig cells arise sequentially, one during embryonic development referred as the fetal Leydig  
47 cells (FLCs) and the other postnatally referred as the adult Leydig cells (ALCs) (Baker et al., 1999;  
48 Habert et al., 2001; O'Shaughnessy et al., 2002; Haider, 2004; Chen et al., 2009). The mouse FLCs  
49 appear in the interstitial compartment of the testis shortly after sex determination at embryonic day  
50 (E)12.5. The FLC population expands considerably during fetal testis development through the  
51 recruitment and differentiation of Leydig progenitor cells rather than by mitotic division of  
52 differentiated FLCs (Byskov, 1986; Kerr et al., 1988; Migrenne et al., 2001; Brennan et al., 2003;  
53 Barsoum and Yao, 2010; Ademi et al., 2020). The maximum number of FLCs is reached around  
54 birth and regresses over the first two weeks of postnatal life (Kerr et al., 1988; Shima, 2019). The  
55 ALCs appear around one week after birth and increase in number during puberty. They arise from  
56 LC progenitors located in the testicular interstitium (Davidoff et al., 2004; Barsoum et al., 2013;  
57 Shima et al., 2013; Kilcoyne et al., 2014; Ademi et al., 2020). Two recent studies showed that both  
58 fetal and adult Leydig cells derive from a common pool of progenitor cells originating from the  
59 gonadal surface epithelium and mesonephric mesenchymal cells present from fetal life (Ademi et  
60 al., 2020; Shen et al., 2020). Evidence also shows that a subset of FLCs dedifferentiate at fetal  
61 stages to serve as potential ALC stem cells (Shima et al., 2018).

62 The rodent FLCs and ALCs have distinct morphological and functional differences. The FLCs  
63 display a high proportion of lipid droplets, while mostly absent in the ALCs (Huhtaniemi and  
64 Pelliniemi, 1992; Shima, 2019). Unlike ALCs, the FLCs are not capable of fully synthesising  
65 testosterone on their own. They express all the enzymes necessary for androgen synthesis except  
66 HSD17B3, which converts androstenedione to testosterone. The conversion of androstenedione  
67 produced by the FLCs is achieved by the adjacent fetal Sertoli cells that express HSD17B3  
68 (O'Shaughnessy et al., 2000; Shima et al., 2013). Another notable difference between fetal and  
69 adult LCs is their regulation by the pituitary gonadotropins. Although the luteinizing hormone (LH)  
70 receptor is expressed from E16.5 in FLCs and later in ALCs (O'Shaughnessy et al., 1998), LH  
71 signalling is dispensable for FLCs development, but prove to be essential for ALCs development  
72 and testosterone production. Neonatal mouse mutants for LH/CG receptors display testes  
73 indistinguishable from control mice. In contrast, testes from adult mutants for LH/CG receptors are

74 reduced in size, with fewer and hypoplastic ALCs, and show impaired testosterone production (Lei  
75 et al., 2001; Zhang et al., 2001; O’Shaughnessy and Fowler, 2011; Teerds and Huhtaniemi, 2015).  
76 FLC function is normal in the absence of endogenous circulating gonadotropins (O’Shaughnessy  
77 et al., 1998) but markedly reduced in late gestation in *T/ebp/Nkx2.1* null mice lacking a pituitary  
78 gland (Pakarinen et al., 2002). This suggests that additional hypothalamo/pituitary hormones, other  
79 than LH, may be required for FLC function and androgen production. Interestingly, two additional  
80 hormones have been reported to stimulate testosterone production in fetal testis.  
81 Adrenocorticotrophic hormone (ACTH) has been reported to stimulate *in vitro* testosterone  
82 production in fetal and neonatal testes (O’Shaughnessy et al., 2003). In parallel, corticotropin-  
83 releasing hormone (CRH) has been reported to stimulate steroidogenesis by direct activation of  
84 FLCs in fetal rat and mouse testes *ex vivo* and in MA-10 mouse Leydig cells (McDowell et al.,  
85 2012), but not in primary ALCs (Huang et al., 1995; McDowell et al., 2012).  
86 While testosterone synthesis is subjected to intensive studies, our knowledge of FLCs and ALCs  
87 origins, development, and in particular similarities and differences is still incomplete. Multiple  
88 transcriptomic studies including either mouse fetal or adult Leydig populations have been  
89 performed on whole gonads or purified cell populations in a given context (Nef et al., 2005;  
90 Beverdam and Koopman, 2006; Jameson et al., 2012; Munger et al., 2013; McClelland et al., 2015;  
91 Inoue et al., 2016; Miyabayashi et al., 2017). To date, no comprehensive comparison of FLCs and  
92 ALCs has been yet performed, and the identification of discriminant transcriptional signatures  
93 would be useful in distinguishing the two LC populations. In the present study, we employed a  
94 combination of bulk and single-cell RNA sequencing (RNA-seq and scRNA-seq) analyses to  
95 compare the transcriptome of FLCs and ALCs. While deep RNA-seq on purified Leydig cell  
96 populations allows the exploration of the transcriptomic landscape of FLCs and ALCs, including  
97 low expressed genes and alternative splicing; the high resolution of scRNA-seq allows us to bypass  
98 contamination issues inherent to cell population purification methods, and to identify specific  
99 marker genes that discriminate FLCs and ALCs amongst the other testicular cells. Our results  
100 provide a comprehensive view of the FLCs and ALCs transcriptional similarities and differences,  
101 unveiling important variations in terms of gene expression level and alternative splicing between  
102 the two populations of LCs. Furthermore, our analyses uncovered FLC- and ALC-specific markers  
103 that represent useful tools to study these two steroidogenic populations. Finally, amongst the FLCs  
104 specific markers we found the corticotropin-releasing hormone receptor 1 (*Crhr1*), suggesting

105 FLCs androgen synthesis is influenced by CRH.

106

107

## 108 **Material & Methods**

109

### 110 **Mouse strains**

111 Embryos were collected from timed pregnant female CD-1 outbred mice (Charles River) and  
112 heterozygous Tg(*Nr5a1-GFP*) transgenic male mice (Stallings, 2002). The mating plug observed  
113 the next morning is designated as E0.5 were used in this study. Animals were housed and cared  
114 according to the ethical guidelines of the Direction Générale de la Santé of the Canton de Genève  
115 (GE/57/18 30080).

116

### 117 **Fetal and adult Leydig cell purification**

118 The purification of fetal Leydig cells was carried out in seven independent experiments based on a  
119 previously described experimental protocol (Nef et al., 2005; Pitetti et al., 2013; Stévant et al.,  
120 2018). The resulting cells were pooled to achieve the amount of RNA required for the preparation  
121 of the RNA sequence library (**Supplementary Table S6**). In short, adult CD-1 females were time-  
122 mated with heterozygous Tg(*Nr5a1-GFP*) transgenic male and checked for the presence of vaginal  
123 plugs the next morning (E0.5). On the relevant days of gestation (E18.5), females were sacrificed  
124 by CO<sub>2</sub> inhalation and the embryos collected in PBS. The sex and the presence of the *Nr5a1-GFP*  
125 transgene in the embryos were assessed under a fluorescent binocular microscope. Testes were  
126 isolated and incubated 20 minutes with trypsin-EDTA 0.05%, mechanically dissociated with gentle  
127 pipetting, and filtered through a 70µm cell strainer to obtain single cell suspension.

128 Adult Leydig cells purification has been performed in four independent experiments  
129 (**Supplementary Table S6**). Hundred-day-old (P100) heterozygous Tg(*Nr5a1-GFP*) transgenic  
130 male mice were used for this experiment. Mice were sacrificed with Esconarkon injection and  
131 ~1 mL of blood was collected by intracardiac puncture for serum extraction. Tunica albuginea of  
132 the testes were delicately removed and testes were incubated in DMEM supplemented with  
133 collagenase (1 mg/mL C0130; Sigma-Aldrich, St. Louis, MO), hyaluronidase (2 mg/mL H3506;  
134 Sigma-Aldrich), and DnaseI (0.8 mg/mL dN25; Sigma-Aldrich) at 37°C for 20 minutes with gentle  
135 agitation. After two rounds of seminiferous tubules sedimentation, the supernatants enriched in

136 interstitial cells were collected and incubated 10 minutes with Trypsine-EDTA 0.05%. Cells were  
137 centrifuged and filtered through a 70 $\mu$ m cell strainer to obtain single cell suspension.  
138 Nr5a1-GFP<sup>+</sup> cells from E18.5 and P100 testes were then sorted by fluorescent-active cell sorting  
139 (BD FACS ARIA II), excluding cell doublets, and the dead cells with Draq7<sup>TM</sup> dye staining. Cells  
140 were collected directly into RLT buffer from Qiagen RNeasy Mini kit for RNA extraction.

141  
142 **Bulk RNA-sequencing library preparation and sequencing**  
143 RNA was extracted from Nr5a1-GFP<sup>+</sup> cells with the RNeasy Mini kit (Qiagen) to obtain a  
144 minimum of 260 ng of total RNA. The composition of the different samples is detailed in  
145 **Supplementary Table S6**. Sequencing libraries were prepared from 150 ng of DNA with the  
146 TruSeq Stranded Total RNA Library Prep Gold (Ribo-Zero) and sequenced on an Illumina HiSeq  
147 2500 (50 bp, paired end, ~35 million reads expected) at the Genomics Platform of the University  
148 of Geneva.

#### 149 150 **RNA-sequencing analysis**

151 Reads were demultiplexed with Casava (v1.8.2), mapped with GemTools (v1.7.1) (Marco-Sola et  
152 al., 2012) and read counts and RPKM gene expression quantifications were calculated with an in-  
153 house pipeline based on Gencode annotation GRCm38 (v4). Globally, over 88% of the reads  
154 mapped to exonic regions. Pre-ranked gene set enrichment analysis was performed using GSEA  
155 (v4.1.0) with the mean RPKM expression as ranking, and using the genes with a mean RPKM>1  
156 (Subramanian et al., 2005). Spearman correlation and principal component analysis (PCA) using  
157 the R base stats package, revealed a very high correlation for both biological triplicates of ALCs  
158 and FLCs (Spearman correlation score >98%, see **Supplementary Figure 1C and D**). Similarly,  
159 the correlation between the two conditions, ALCs and FLCs, is also very high (Spearman  
160 correlation score >88%). We used the R package DESeq2 (v1.24.0) (Love et al., 2014) for the  
161 differential expression analysis. Genes with fewer than 10 reads were not taken into account. GO  
162 terms enrichment analysis was computed on the selected genes enriched in FLCs and in ALCs with  
163 the R packages ClusterProfiler (v3.12.0) (Yu et al., 2012).  
164 Differential splicing analysis was performed using rMATS (v3.2.5) (Shen et al., 2012, 2014) with  
165 the bam files as input. Splicing event with an FDR<=0.05 were considered as significant.

166

## 167 **Single-cell RNA-sequencing library preparation and sequencing**

168 Single-cell library of E16.5 testis from Neirijnck et al. (Neirijnck et al., 2019) (**GSE123119**) was  
169 prepared with the Chromium Single Cell 3' Library v2 kit and sequenced targeting 5,000 cells with  
170 an Illumina HiSeq 4000 (100 bp, paired-end, 100,000 reads per cell expected) with MacroGen  
171 (<http://foreign.macrogen.com/eng/>).

172 Adult testis from adult mice (C57BL/6J mice) single-cell RNA sequencing data come from Ernst  
173 et al. (Ernst et al., 2019) (**E-MTAB-6946**). We used the libraries do15983, do15984, do17622,  
174 do17623, do17815, do17816, do18197, do18198, do18199 of mice older than 60 days old from  
175 Ernst et al. The libraries were prepared with the Single Cell 3' Library v2 kit and sequenced with  
176 an Illumina HiSeq 2500.

177

## 178 **Data processing with the Cell Ranger package, cell selection and in-house quality controls**

179 Computations were performed at the Vital-IT Centre for high-performance computing of the SIB  
180 (Swiss Institute of Bioinformatics) (<http://www.vital-it.ch>). Demultiplexing, alignment, barcode  
181 filtering and UMI counting were performed with the Cell Ranger v2.1 pipeline (10x Genomics).  
182 Reference genome has been modified to include the eGFP transgene with the mkref function. Data  
183 were mapped to the mouse reference genome GRCm38.p5 in which the *eGFP* and the bovine GH  
184 3' splice/polyadenylation signals (NM\_180996.1) (Stallings, 2002) sequences have been added,  
185 and annotated with Gencode vM15. Only protein coding genes and long non-coding RNAs were  
186 retained for further analysis.

187 To set a threshold between cell containing barcodes and empty ones, we computed the knee point  
188 and the inflection point of the ranked barcode distribution plot. Then, we detected the local  
189 minimum between these points on the density curve (density base R function, bw=500, n=4,096)  
190 of the UMI number per barcode using the quantmod R package (v0.4-16). This local minimum was  
191 used as a threshold for cell selection.

192

## 193 **Single-cell RNA-sequencing analysis**

### 194 *E16.5 mouse RNA-sequencing data*

195 The single-cell RNA sequencing analysis of the E16.5 testis (Neirijnck et al., 2019) were performed  
196 using the Seurat software package (v2.3.4). From the raw matrix obtained with Cell Ranger version  
197 2.0 (10X Genomics), we filtered cells based on the UMI count per cell (>2300 UMI) and on the

198 percentage of mitochondrial genes (>0.05% of mitochondrial genes) resulting in 3,781 cells. Then,  
199 we reduced the size of the dataset using Principal Component Analysis (PCA) on the genes  
200 expressed in more than 50 cells (9,576 genes) and calculated the UMAP representation (Becht et  
201 al., 2019) and finally grouped the cells with Louvain algorithm (Waltman and van Eck, 2013)  
202 (resolution=1) using the 15th first PCs. We classified the clusters according to the marker genes of  
203 the different cell types in the literature, including the genes *Nr5a1*, *Star*, *Cyp11a1*, *Insl3*, *Hsd17b3*,  
204 *Amh*, *Sox9*, *Arx*, *Nr2f2*, *Pecam1*, *Cdh5*, *Esam*, *Pou5f1*, *Ddx4* (Castrillon et al., 2000; Wakayama et  
205 al., 2003; Okamura et al., 2008; Yu et al., 2009; Buaas et al., 2012; Wen et al., 2016; Kumar et al.,  
206 2017; Stévant et al., 2018; Ernst et al., 2019; Mucenski et al., 2019) and identified cluster 7 as  
207 Leydig cells.

208  
209 *Adult mouse single-Cell RNA-Sequencing data*  
210 We selected the libraries do15983, do15984, do17622, do17623, do17815, do17816, do18197,  
211 do18198, do18199 of mice older than 60 days old from Ernst et al. (Ernst et al., 2019). These  
212 libraries were analysed with Cell Ranger v1.3.1 software using the default threshold to obtain high-  
213 quality cells with large numbers of UMIs. We filtered out cells with <500 UMI and we excluded  
214 cells with more than 5% of reads mapping to the mitochondrial genome. We selected only protein-  
215 coding genes. Then, we inferred cell labels with the annotation furnished by Ernst et al., and  
216 removed cells labelled as “Outliers”. So, 24,672 cells were used. We confirmed the cell type  
217 classification of Ernst et al. with genes known from the literature (*Cyp11a1*, *Star*, *Insl3*, *Cyp17a1*,  
218 and *Fabp3*) (Stévant et al., 2018; Ernst et al., 2019).

219  
220 *Merge of Fetal and Adult single-cell RNA Sequencing data*  
221 In order to compare the Leydig cells present at fetal and adult stages, we merged the single-cell  
222 RNA sequencing datasets with the MergeSeurat function (Seurat, v2.3.4). We normalised and  
223 computed the Principal Component Analysis (PCA) using the genes expressed in more than 50  
224 cells. The 10 first components of this PCA were used to compute the corrected neighbour graph  
225 with BBKNN (balanced batch KNN, v1.3.8) (Polański et al., 2019) and then, the umap  
226 representation. We made use of the previous cell annotation to distinguish fetal and adult  
227 populations and we ensured the cell identity using marker gene expression. This list includes the  
228 genes *Nr5a1*, *Star*, *Cyp11a1*, *Insl3*, *Hsd17b3*, *Amh*, *Sox9*, *Arx*, *Nr2f2*, *Pecam1*, *Cdh5*, *Esam*,



229 *Pou5f1*, *Ddx4*, *Dmrt1*, *Piwill*, *Pex21*, and *Tnp1*. We performed a differential expression analysis  
230 (Mann-Whitney Wilcoxon test) between FLCs and ALCs clusters using Seurat FindMarkers  
231 function (only positive markers, min.pct=0.25, thresh.use=0.25). We identified genes showing a  
232 high expression in the one population of Leydig cells and a low expression in the other population  
233 (adj. p-value $<0.01$ , avg logFC $>0.5$ , pct.1 $>0.5$ , pct.2 $<0.25$ ), and overexpressed as well in the same  
234 population in the DESeq2 analysis.

235 From this selection, in order to select the genes with specific expression in one Leydig cell  
236 population and with a low expression in all other populations in the testis, we used an additional  
237 differential expression analysis between all cell types using Seurat FindAllMarkers function (only  
238 positive markers, p\_val\_adj $<0.01$  & avg\_logFC $>0.5$  & pct.1 $>0.5$  & pct.2 $<0.25$ ) was used to  
239 compute marker genes for every cluster. The intersect of the two differential expression analysis  
240 with Seurat is used to get a list of the marker genes of FLCs and ALCs specifically.

241

#### 242 **RNAscope® analyses (*In situ* hybridization)**

243 Adult (P100) and embryonic (E16.5) *Nr5a1-eGFP* samples from timed mated females were  
244 collected and fixed overnight in 4% paraformaldehyde, dehydrated and embedded in paraffin. Five  
245  $\mu\text{m}$  thick sections were examined histologically *via* haematoxylin and eosin staining. We  
246 performed the RNAscope® 2.5 HD DuplexAssay protocol following the recommendation of  
247 BioTechne. The *Star* probes (C2) to label Leydig cells, and the probes for the candidates *Crhr1*  
248 (C1), *Ren1* (C1), *Bhmt* (C1) and *Sult1e1* (C1) were tested. Slides were imaged using an Axioskop  
249 2 plus confocal microscope and ZEN 2009 software (Carl Zeiss Ltd, Hertfordshire, UK). For  
250 reproducibility purpose, at least three different animals of each group were tested.

251

#### 252 **Immunostaining**

253 Animals were bred and maintained in strict compliance with the Animals (Scientific Procedures)  
254 Act, 1986. All procedures were conducted in accordance with United Kingdom Home Office  
255 regulations under project licenses 60/4200 and 70/8804 held by Lee B. Smith.

256 Neonatal and adult tissues were fixed in Bouins for 6 hours, stored in ethanol 70% and embed in  
257 paraffin. Sections of 5  $\mu\text{m}$  were dewaxed in xylene, rehydrated in graded ethanol solutions. For the  
258 double immunostaining, slides were antigen-retrieved in pressure cook with 0.01M citrate buffer  
259 (pH 6.0). To quench endogenous peroxidases activity, slides were incubated in 0.3% hydrogen

260 peroxide (v/v) in TBS for 30 min at room temperature (RT). The non-specific activity was blocked  
261 using the appropriate normal blocking serum for 30 min at RT followed by incubation overnight at  
262 4°C with the first primary antibody diluted in blocking serum. After washing, slides were incubated  
263 for 30 min at RT with the appropriate secondary antibody conjugated to peroxidase and diluted  
264 1/200 in blocking serum and left on the slides for 30 min at RT. Sections were then incubated with  
265 Tyramide Signal Amplification system ('TSA™', Perkin Elmer) diluted 1/50 for 10 min at RT  
266 according to the manufacturer's instructions. Slides were then stained with the second Primary  
267 antibody and washed as an incubated as described above with secondary and Tyramide. Sections  
268 were then counterstained in Sytox Green (Molecular Probes, life technologies, Paisley, UK) for 10  
269 min at RT and mounted in PermaFluor mounting medium (Thermo Scientific, UK). Slides were  
270 scanned using an LSM 710 confocal microscope and ZEN 2009 software (Carl Zeiss Ltd,  
271 Hertfordshire, UK). The primary and adequate secondary antibodies used in this study are detailed  
272 in **Supplementary Table S7**. To assure the specificity of the stained tissue, sections incubated with  
273 no primary antibody were used as negative controls. For reproducibility purpose, at least three  
274 different animals of each group were tested.

275

## 276 **Data Availability**

277 The fetal and adult Leydig cell bulk RNA-seq data are available on GEO (NCBI) under accession  
278 number **GSE171746**.

279

## 280 **Results**

### 281 **A global view of fetal and adult Leydig cell transcriptomes**

282 To compare the transcriptomic signatures of FLCs and ALCs, we purified Leydig cells at  
283 embryonic day (E) 18.5 and postnatal day (P) P100. To proceed, we FAC-sorted the highest GFP  
284 positive cell population corresponding to Leydig cells from *Nr5a1-eGFP* testes (Stallings, 2002)  
285 (**Figure 1A; Supplementary Figure 1A and A'**). We then performed RNA sequencing of  
286 poly(A)<sup>+</sup> RNAs in biological triplicates for the two stages. In total, we identified 20,859 and 21,195  
287 expressed genes in FLCs and ALCs respectively (with RPKM $\geq$ 1), with 78.5% ( $\pm$ 0.5) of them being  
288 protein coding. We evaluated the purity of our FLCs and ALCs samples by measuring the  
289 expression level of several genes specific to different testicular cells (**Supplementary Figure 1B**).  
290 Our samples display high expression levels of the Leydig cell marker genes *Cyp11a1*, *Insl3*,

291 *Cyp17a1*, *Hsd3b1*, and *Star* (Rebourcet et al., 2019). In contrast, expression of marker genes for  
292 Sertoli cells (*Sox9*, *Dhh*, *Amh*) (Bitgood et al., 1996; Liu et al., 2016; Rehman et al., 2017),  
293 interstitial progenitors cells (*Nr2f2*, *Arx*, *Tcf21*), germ cells (*Dazl*, *Ddx4*, *Pou5f1*) (Castrillon et al.,  
294 2000; Okamura et al., 2008; Yu et al., 2009), and endothelial cells (*Tek*, *Pecam1*, *Esam*) (De Val  
295 and Black, 2009; Stévant et al., 2018), immune cells (*Cxcl2*, *Ptprc*, *Coro1a*), and peritubular myoid  
296 cells (*Acta2*, *Myh11*, *Cnn1*) were low, confirming the high degree of enrichment of our FLC and  
297 ALC samples (Chen et al., 2014; Rebourcet et al., 2014).

298 We show that the ALCs express in excess the *Insl3* gene with an average of 21,113 RPKM,  
299 followed by *Aldh1a1* (8,050 RPKM) and *Cyp17a1* (5,742 RPKM). Together the RNA abundance  
300 of three genes represents 9.4% of the whole transcriptome. The FLCs do not display such an  
301 extreme over-representation of the same genes, but the top three expressed genes are *mt-Co1* (7,501  
302 RPKM), *Hsd3b1* (5,357 RPKM), and *Insl3* (3,947 RPKM), which represent 5.4% of the total  
303 transcriptome. To appreciate the biological functions enriched amongst the most expressed genes  
304 of FLCs and ALCs, we performed a pre-ranked gene set enrichment analysis of the transcriptomes,  
305 weighting genes by their level of expression. While in FLCs we observed a statistical enrichment  
306 of 345 GO terms (FDR<25%), including “glucocorticoid biosynthetic process”, “C21 steroid  
307 hormone metabolic process” and “regulation of systemic arterial blood pressure by renin  
308 angiotensin” in the top terms, no statistical enrichment was observed for the ALCs. Although not  
309 statistically enriched, we could find in the top terms “glucocorticoid metabolic process”, “C21  
310 steroid hormone metabolic process”, and “circadian sleep wake cycle” (of note, the P100 mice  
311 were euthanized in the morning, and we know testosterone synthesis is sensitive to the circadian  
312 rhythm (Chen et al., 2017)) (**Supplementary Table S2**). These results indicate that both fetal and  
313 adult Leydig cells are highly specialised cells dedicated to steroid production. For all subsequent  
314 analyses, we retained only the genes coding for proteins and long non-coding RNA (lncRNA).

315

### 316 **Wide variations in gene expression levels were observed between FLCs and ALCs**

317 We then thought to evaluate the extent to which the transcriptomes of the two Leydig cell  
318 populations are comparable and what genes and biological pathways are differentially expressed.  
319 Among the 21,083 protein coding and long-non-coding genes expressed in either FLCs or ALCs,  
320 15,330 genes have no significant difference of expression (**Figure 1B** and **Supplementary Table**  
321 **S1**). Interestingly, a large proportion of genes (5,753 genes, *i.e.* 27% of the total) display significant

322 variations of expression levels between ALCs and FLCs (adjusted p-value<0.01). Of these genes,  
323 2,357 are overexpressed in FLCs (FC>2) (**Figure 1B** and **C**). The vast majority of genes  
324 overexpressed in FLCs have never been identified as such. This is particularly the case for the top  
325 30 genes with the lowest adjusted p-value such as *Cdkn1c*, *Gpc3*, *Cbln1*, *Sfrp1*, *Myadm*, *Glis2*,  
326 *Peg3* and *Smoc2*. In addition, we found also *Thbs2* and *Mc2r*, two genes known to be specifically  
327 expressed in FLCs (O'Shaughnessy et al., 2002, 2003) as well as 50 genes already reported to be  
328 expressed - although not specifically - in FLCs (Jameson et al., 2012; McDowell et al., 2012;  
329 McClelland et al., 2015; Inoue et al., 2016) ). We grouped the genes differentially expressed into  
330 15 clusters according to their expression profile using a hierarchical clustering (**Figure 1D**). Genes  
331 enriched in FLCs are grouped in clusters 3, 4, 7, 8, 9, and 13. Gene Ontology (GO) analysis of  
332 these clusters revealed an association with the development of the urogenital system (cluster 3),  
333 cell division and differentiation (cluster 4), various metabolic processes (clusters 7, 9, 13), and  
334 response to reactive oxygen species (ROS) (cluster 13) (**Supplementary Table S2**). On the other  
335 side, 3,396 genes were found overexpressed in ALCs (FC<0.5) (**Figure 1B** and **C**). Again, the  
336 large majority of genes overexpressed in ALCs have never been identified as such. This is  
337 particularly the case for genes with the lowest adjusted p-value such as *Gstm2*, *Gstm1*, *Amy1*, *Csf1*,  
338 *Timp2*. As expected, we have found genes known to be specifically expressed in ALCs such as  
339 *Hsd3b6*, *Hsd17b3*, *Vcam1*, *Sult1e1* and *Hpgds* (O'Shaughnessy et al., 2002), as well as 750 genes  
340 already reported to be expressed - although not specifically - in ALCs (Sanz et al., 2013;  
341 O'Shaughnessy et al., 2014). Genes enriched in ALCs are grouped in clusters 2, 5, 6, 10, 11, 12,  
342 14 and 15. This time, GO analysis of these clusters indicated a link with fertilisation (clusters 2, 5),  
343 regulation of cellular response (cluster 10), cell-substrate adhesion (cluster 11), regulation of ROS  
344 (cluster 14), and various metabolic processes (clusters 12, 14, 15) (**Supplementary Table S2**). The  
345 cluster 1 regroups genes with low expression in both LC populations that are involved in stress and  
346 immune response. This association with the immune system is consistent with the role of cytokines  
347 secreted by testicular macrophages in the regulation of Leydig cell functions (Hales, 2002).  
348 Overall, we observed significant variations in the level of expression of thousands of genes, with  
349 only a handful of genes exhibiting specific expression in one of the two Leydig cell populations.

350

### 351 **Differential splicing between FLCs and ALCs**

352 Alternative splicing is a ubiquitous regulatory mechanism that allows the generation of multiple

353 transcript isoforms from a single gene, thus expanding the complexity of the proteome. However,  
354 the extent of alternative splicing occurring in FLCs and ALCs and its functional relevance remain  
355 unclear. To investigate whether these two cell populations exhibit different alternative splicing  
356 profiles, we performed a multivariate analysis of transcript splicing. We found 1,971 splicing  
357 events that are statistically different between the two LC populations (FDR<0.05) (1,380 events in  
358 FLCs and 591 in ALCs) (**Figure 2A, Supplementary Table S2**). These splicing events occur in  
359 1,437 genes, including 1,036 genes in FLCs, and 509 genes in ALCs (with 31 genes having an  
360 alternative splicing in both cell populations). We also examined if the genes detected as  
361 alternatively spliced correspond to differentially expressed genes. Of the 2,357 FLCs  
362 overexpressed genes, 86 of them show an alternative splicing. In the ALCs, 56 genes out of the  
363 3,396 overexpressed genes show an alternative splicing. It appeared that the genes involved in  
364 steroidogenesis are not subject to alternative splicing in both FLCs and ALCs.

365 As shown in **Fig. 2A**, intron retention is the most represented type of alternative splicing in the  
366 FLCs, with 742 events found in FLCs but only 34 in ALCs. We investigated if the genes presenting  
367 the different type of alternative splicing in both populations are enriched in a particular biological  
368 function by performing a GO enrichment analysis (**Supplementary Table S3**). In FLCs, the genes  
369 presenting exon skipping are strongly enriched in RNA splicing functions (**Figure 2B**), while genes  
370 showing intron retention are involved in mRNA processing and chromatin rearrangements (**Figure**  
371 **2C**). Regarding ALCs, genes showing exon skipping are involved in various processes such as  
372 cellular organization, cellular projection, or muscle system process (**Figure 2D**). No GO  
373 enrichment was found in the other types of alternative splicing due to the small number of genes.  
374 Overall, we showed that intron retention is a landmark of the FLC transcriptome. It is known that  
375 alternative splicing is frequent during embryonic development, usually cell/organ specific and  
376 plays a role in gene expression regulation and protein diversity (Revil et al., 2010; Kalsotra and  
377 Cooper, 2011; Grabski et al., 2021).

378

### 379 **Characterisation of mutually exclusive marker genes/signatures of FLCs and ALCs**

380 A thorough identification of the genes specifically expressed in FLCs and ALCs has never been  
381 achieved. Although our comparative analysis identified many genes that are differentially  
382 expressed between FLCs and ALCs, there is no evidence that these are specific to FLCs or ALCs.  
383 Indeed, many of them may also be expressed in other testicular cell types. To identify FLC- and

384 ALC-marker genes, we took advantage of existing single-cell RNA sequencing data from E16.5  
385 testes (3,781 cells) (Neirijnck et al., 2019) and adult testes (24,672 cells) (Ernst et al., 2019). We  
386 combined these fetal and adult datasets to evaluate the gene expression specificity. Using five well-  
387 established Leydig cell markers, namely *Hsd3b1*, *Star*, *Cyp11a1*, *Cyp17a1* and *Fabp3*, we  
388 identified 151 FLCs and 148 ALCs (**Figure 3**) (Ernst et al., 2019; Rebourcet et al., 2019). By  
389 comparing the sets of genes specifically enriched in ALCs and FLCs obtained with the single-cell  
390 RNA sequencing and the bulk RNA sequencing approaches described above, we generated a high-  
391 confidence selection of 62 genes enriched in FLCs showing a link with cell proliferation and  
392 differentiation, and hormone secretion (**Supplementary Table S3**) and 120 genes enriched in  
393 ALCs related to protein processing, spermatid development, and metabolic processes  
394 (**Supplementary Table S4**).

395

#### 396 **Identification of nine FLC-specific marker genes**

397 Although we have identified 62 genes showing an expression in FLCs and low or no expression in  
398 ALCs, there is no evidence that these genes are specific to FLCs. Using single-cell transcriptomic  
399 data, we excluded the ones that were also expressed in other testicular cell populations. We have  
400 thus identified nine genes that were considered as specific testicular markers of FLCs (**Figure 4A-**  
401 **G** and **Table 1**). This includes genes *Crhr1* (McDowell et al., 2012; McClelland et al., 2015; Inoue  
402 et al., 2016) (**Figure 4C**), *Ren1* (Jameson et al., 2012; Inoue et al., 2016) (**Figure 4D**) and *Vsn11*  
403 (Jameson et al., 2012; McClelland et al., 2015) (**Figure 4E**), whose expression in FLCs (but not  
404 their specificity) has already been demonstrated. In addition, we have identified six additional  
405 genes described for the first time as FLC specific markers, including *Cyp26b1* (**Figure 4F**), *Gsg11*,  
406 *Pcsk6*, *Nppc*, *Cdon* and *Ppp2r5b*. Contrary to our expectations, *Mc2r* and *Thbs2* are not part of our  
407 selection. *Thbs2* is excluded by our filters because it does not show any enrichment in FLCs  
408 compared to ALCs, while *Mc2r* (**Figure 4G**) seems specific to FLCs but is not retained due to its  
409 low expression in single-cell transcriptomic data. The specific expression of FLC marker genes  
410 *Crhr1* and *Ren1* was validated by *in situ* hybridisation and compared with *Star* expression, a known  
411 marker of Leydig cells (**Figure 4H-K**). We found that both *Crhr1* and *Ren1* are co-expressed with  
412 *Star* in E18.5 testis but not in adult P100 testis, confirming that these genes are specifically  
413 expressed in FLCs and not in ALCs or any other testicular cells (**Figure 4H-K**).

414

## 415 **Identification of 50 ALC-specific marker genes**

416 We used the same approach to identify testicular marker genes specific to ALCs. Among the 120  
417 genes specifically enriched in ALCs (compared to FLCs), 50 genes were considered as specific  
418 markers of ALCs (**Figure 5A-G** and **Table 2**). Among these 50 genes, we found *Hsd17b3* and  
419 *Hsd3b6*, two known markers of ALCs confirming our analysis. The remaining 48 genes are  
420 described for the first time as ALC specific markers. The analysis of the GO terms highlighted  
421 cellular processes such as protein transformation (*Klk1b21*, *Klk1b24*, *Klk1b27*, *C1rl*), peptidase  
422 regulation (*Serpina3c*, *Serpina3g*, *Serpina3n*, *Serpina5*) as well as metabolic processes (*Hsd17b3*,  
423 *Sult1e1*, *Bhmt*). To validate further our analysis, the specific expression of ALC marker genes *Bhmt*  
424 and *Sult1e1* was confirmed by *in situ* hybridisation (**Figure 5H-K**). We found that *Bhmt* and  
425 *Sult1e1* are co-expressed with *Star* in adult P100 testis but not in fetal E18.5 testis confirming that  
426 these genes are specifically expressed in ALCs and not in FLCs or any other testicular cells.

427  
428 Overall, our analysis combining both bulk RNA sequencing and single-cell RNA sequencing  
429 resulted in the identification of 9 and 50 specific markers for FLCs and ALCs, respectively, most  
430 of which are newly identified.

## 431 432 **Discussion**

433 The main purpose of our study was to characterize at transcriptomic level the similarities and  
434 differences between FLCs and ALCs, the major androgenic cells of the testis, using both bulk and  
435 single-cell RNA sequencing. Significant differences were observed both in terms of expression  
436 level, with 2,357 genes overexpressed in FLCs (11.2% of the total) and 3,396 genes overexpressed  
437 in ALCs (16.1%); and in terms of alternative splicing, with an over-representation of intron  
438 retention events in FLCs compared to ALCs. Our study also identified many specific markers for  
439 each Leydig cell populations, with 9 genes for FLCs and 50 genes for ALCs, most of them newly  
440 described.

## 441 442 **Identification of FLC- and ALC-specific genes**

443 The purity of the Leydig cell population is critical for the identification of Leydig cell markers  
444 using microarray and bulk RNA sequencing analyses. We have multiple indications that support  
445 the assertion that the 9 FLC-specific markers - and 50 ALC-specific markers - identified in this

446 study are robust and specific. First, our transcriptomic analysis combines two independent sources  
447 of data, namely those from the bulk RNA sequencing data of FLCs and ALCs, in which Leydig  
448 cells were sorted according to the level of GFP expression, but also a single-cell RNA sequencing  
449 of the testes of fetal and adult mice. In addition, the few markers already known, in particular  
450 *Hsd17b3* and *Hsd3b6* were also identified in the list of markers specific for ALCs. Finally, an  
451 independent validation by RNAscope® of *Ren1* and *Crhr1* as FLC-specific marker genes, and  
452 *Bhmt* and *Sult1e1* as ALC-specific marker genes, confirmed their specific expression.

453  
454 Several genome-wide expression studies using microarray technology or bulk RNA sequencing  
455 have investigated the transcriptome of FLCs (Jameson et al., 2012; McDowell et al., 2012;  
456 McClelland et al., 2015). In these studies, they isolated and evaluated the transcriptome of several  
457 populations present in the fetal testis, such as germ cells, Sertoli cells, Leydig cells and interstitial  
458 cells. Differential analysis of expression among these cell populations led to the identification of  
459 166 overexpressed genes in FLCs. However, since the analysed cell populations represent only a  
460 fraction of the cell types present in the fetal testis, this list of FLC overexpressed genes is  
461 overestimated. In contrast, our analysis combining bulk and single cell RNA-seq identified nine  
462 FLC-specific candidates of which three were already described in these previous studies. We found  
463 that the other genes initially described as enriched in FLCs are mostly non-specific, either  
464 expressed in ALCs or in other testicular cell types. Among the three genes specifically enriched in  
465 FLCs are the *Crhr1* (McDowell et al., 2012), *Vsn11* (Jameson et al., 2012; McClelland et al., 2015)  
466 and *Ren1* (Jameson et al., 2012) genes. The *corticotropin releasing hormone receptor 1* (*Crhr1*) is  
467 of particular interest as its ligand CRH (Corticotropin Releasing Hormone) is known to stimulate  
468 testosterone production in the fetal testes (McDowell et al., 2012) (see last paragraph of the  
469 discussion for more details and **Figure 6**). Moreover, our analysis revealed six new FLC-specific  
470 candidates including *Cyp26b1*, a gene coding for an enzyme degrading retinoic acid (RA), an active  
471 metabolite of retinol involved in meiosis regulation (Bowles et al., 2006; Koubova et al., 2006). It  
472 has recently been reported that in *Cyp26b1*<sup>-/-</sup> mutant mice, Leydig cell differentiation is impaired  
473 and steroidogenesis is decreased (Bowles et al., 2018).

474 Previous transcriptomics studies have used indirect methods to identify ALC-specific mRNA  
475 transcripts, such as the response of Leydig cells to hormones (Sanz et al., 2013), or cell ablation  
476 model using ethane dimethane sulphonate (EDS) to ablate LCs in adult male rats (O'Shaughnessy



477 et al., 2014). These studies have resulted in a combined list of over 2000 genes whose expression  
478 is enriched in ALCs. Although ingenious, these approaches due to their technical bias and  
479 limitations do not guarantee an ALC-specific expression. Here, we have identified 50 genes with  
480 ALC-specific expression (**Table 2**). Confirming our results, three genes known to be specific for  
481 ALCs, *Hsd3b6*, *Hsd17b3* and *Vcam1* are also present in our list (O’Shaughnessy et al., 2000; Shima  
482 et al., 2013; Wen et al., 2014). Among these 50 genes, six were not described in the previous  
483 studies, namely *Ces1d*, *Serpina3g*, *Rarres1*, *Bpifb5*, *Eppin*, and *Espn*. Hundreds of genes initially  
484 described as enriched in ALCs by previous studies were excluded because their expression was not  
485 specific. This is particularly the case for *Ptgds* and *Hsd11b1*, two genes often described as specific  
486 to ALCs (Baker and O’Shaughnessy, 2001; Wen et al., 2014). In this study, we validated by  
487 RNAscope® the ALC-specific expression of two genes: *Betaine-Homocysteine S-*  
488 *Methyltransferase (Bhmt)* and *Sulfotransferase Family 1E Member 1 (Sult1e1)*. We also proved  
489 the specific expression of BHMT at the protein level by immunohistochemistry (**Supplementary**  
490 **Figure S2**). BHMT plays a key role in regulating betaine concentration, that can be stored to  
491 control cellular osmolarity or metabolised to provide a methyl group for homocysteine methylation  
492 (Alirezai et al., 2012). It has been shown that the testes are among the organs that contains the  
493 most betaine (Slow et al., 2009). SULT1E1, for its part, plays a protective role for Leydig cells and  
494 seminiferous tubules against oestrogen overstimulation by catalysing the sulfo-conjugation and  
495 inactivation of oestrogens (Song, 2007). It is also noteworthy to find several members of the  
496 SERPIN family among our ALC-specific genes (*Serpina3c*, *Serpina3g*, *Serpina3n*, *Serpina5*) as  
497 most of them have been found in Leydig cells and seem to be sensitive to hCG (human chorionic  
498 gonadotropin) (Odet et al., 2006).

499

### 500 **Alternative splicing: high intron retention in FLCs**

501 The main types of alternative splicing are alternative exon usage, alternative 5’ or 3’ splice sites,  
502 mutually exclusive exons, and intron retention. Intron retention is characterized by the inclusion of  
503 one or more introns in mature mRNA transcripts and has been previously considered to be an  
504 artefact of a dysfunctional spliceosome. It is known that alternative splicing, including intron  
505 retention, is frequent during embryonic development and contribute not only to the plasticity of the  
506 transcriptome but also the regulation of gene expression and protein diversity (Revil et al., 2010;  
507 Kalsotra and Cooper, 2011; Grabski et al., 2021). Here, we showed that intron retention is a

508 landmark of the FLC transcriptome. Messenger RNA displaying intron retention are generally  
509 restricted from exiting the nucleus. This was proposed as a mechanism to downregulate gene  
510 expression (Grabski et al., 2021). In FLCs, we also showed that genes presenting alternative exon  
511 skipping are involved in splicing regulation itself. The control expression levels and activities of  
512 RNA binding proteins (RBPs) that regulate RNA splicing is mediated by auto-regulatory feedbacks  
513 by directly influencing the splicing of their own mRNAs (Müller-McNicoll et al., 2019). In  
514 particular, the regulation of the splicing factors of the SR (Serine/arginine rich) family regulate  
515 their activity by modulating the inclusion of a cassette exon containing a premature termination  
516 codon to produce or not a functional protein (Müller-McNicoll et al., 2019). Tight regulation of  
517 the splicing factors is necessary for post-transcriptional gene expression regulation. The intron  
518 retention events observed in FLCs might subsequently result from the auto-regulation feedback of  
519 the splicing factors. Post-transcriptional gene expression regulation through alternative splicing  
520 have been identified as key player in the differentiation of mesenchymal stem cells (Park et al.,  
521 2020). We can postulate that the regulation of the FLC differentiation might also be mediated by  
522 alternative splicing.

523

#### 524 **Differences in FLCs and ALCs transcriptomes affect steroidogenesis and its regulation**

525 FLCs and ALCs display significant differences in both steroidogenic regulation and the type of  
526 androgen produced (androstenedione vs testosterone) (O'Shaughnessy et al., 2000, 2002; Shima et  
527 al., 2013). Our transcriptomic data confirmed the differences in androgen production, the  
528 expression of the *Hsd17b3* gene encoding the enzyme responsible for the conversion of  
529 androstenedione to testosterone is not expressed in FLCs but only in ALCs (**Table 2** and **Figure**  
530 **6**), which explains why FLCs synthesise mainly androstenedione and ALCs are capable of  
531 producing testosterone (O'Shaughnessy et al., 2000; Rebourcet et al., 2020). Regarding the  
532 differences in steroidogenesis regulation, LH appears not to be essential for FLC function since  
533 androgen production and masculinization of the fetus occurs normally in LH/CG receptor knockout  
534 mice (Kendall et al., 1995; Lei et al., 2001; Zhang et al., 2001; Ma et al., 2004; O'Shaughnessy and  
535 Fowler, 2011; Teerds and Huhtaniemi, 2015). However in *T/ebp/Nkx2.1* null mice, which lack a  
536 pituitary gland, testicular androgen levels are markedly reduced in late gestation, suggesting that  
537 additional hypothalamo/pituitary hormones may be required for Leydig cell function and androgen  
538 production. Interestingly, our transcriptomic analysis revealed that the ACTH receptor,

539 melanocortin type 2 receptor (*Mc2r*), and the corticotropin releasing hormone receptor 1 (*Crhr1*)  
540 are both specifically expressed in FLCs and absent from ALCs (**Table 1** and **Figure 6**). ACTH has  
541 been reported to stimulate *in vitro* testosterone production in fetal but not in adult testes suggesting  
542 that FLCs, but not ALCs, are sensitive to ACTH stimulation(O'Shaughnessy et al., 2003).  
543 However, fetal testosterone levels were normal in *Proopiomelanocortin (POMC)*-deficient mice  
544 that lack circulating ACTH, indicating that ACTH, like LH, is not essential for FLC function.  
545 Corticotropin-releasing hormone (CRH) has been also reported to stimulate steroidogenesis by  
546 direct activation of FLCs in fetal rat and mouse testes *ex vivo* and in MA-10 mouse Leydig cells  
547 (McDowell et al., 2012). In contrast, CRH does not enhance steroidogenesis in primary ALCs  
548 (Huang et al., 1995; McDowell et al., 2012). Combined together, these results suggest a sequential  
549 regulation of steroidogenesis in LCs. In this model, androgen production by FLCs is stimulated by  
550 three potentially redundant hypothalamo/pituitary hormones, namely LH, CRH and ACTH. Fetal  
551 androgen production can occur in the absence of any of these hormones with the two other  
552 hormones able to maintain FLC steroidogenic activity. Conversely, activation of steroidogenesis  
553 in ALCs is LH-dependent and CRH- and ACTH-independent, since *Crhr1* and *Mc2r* are not  
554 expressed in these cells (**Figure 6**). Although this model of steroid regulation by Leydig cells needs  
555 to be confirmed by further studies, such a mechanism may have evolved to ensure the production  
556 of adequate levels of androgens during fetal development.

557

## 558 **Acknowledgments**

559 The authors thank Violaine Regard from the NEF laboratory, Cécile Gameiro and Gregory  
560 Schneiter from the Flow Cytometry Facility, the Genomics Platform of iGE3, and the Animal  
561 Facility of the Faculty of Medicine of the University of Geneva.

562

## 563 **References**

- 564 Ademi, H., Stévant, I., Rands, C., Conne, B., and Nef, S. (2020). Expression of Wnt5a defines the  
565 major progenitors of fetal and adult Leydig cells. *bioRxiv*, 2020.07.25.221069.  
566 doi:10.1101/2020.07.25.221069.
- 567 Alirezaei, M., Jelodar, G., and Ghayemi, Z. (2012). Antioxidant defense of betaine against  
568 oxidative stress induced by ethanol in the rat testes. *Int. J. Pept. Res. Ther.* 18, 239–247.  
569 doi:10.1007/s10989-012-9297-9.
- 570 Baker, P. J., and O’Shaughnessy, P. J. (2001). Expression of prostaglandin D synthetase during  
571 development in the mouse testis. *Reproduction* 122, 553–559. doi:10.1530/rep.0.1220553.
- 572 Baker, P. J., Sha, J. A., McBride, M. W., Peng, L., Payne, A. H., and O’Shaughnessy, P. J. (1999).  
573 Expression of 3beta-hydroxysteroid dehydrogenase type I and type VI isoforms in the mouse  
574 testis during development. *Eur. J. Biochem.* 260, 911–917. doi:10.1046/j.1432-  
575 1327.1999.00245.x.
- 576 Barsoum, I. B., Kaur, J., Ge, R. S., Cooke, P. S., and Yao, H. H.-C. H. C. (2013). Dynamic changes  
577 in fetal Leydig cell populations influence adult Leydig cell populations in mice. *FASEB J.* 27,  
578 2657–2666. doi:10.1096/fj.12-225060.
- 579 Barsoum, I. B., and Yao, H. H.-C. (2010). Fetal Leydig Cells: Progenitor Cell Maintenance and  
580 Differentiation. *J. Androl.* 31, 11–15. doi:10.2164/jandrol.109.008318.
- 581 Becht, E., McInnes, L., Healy, J., Dutertre, C. A., Kwok, I. W. H., Ng, L. G., et al. (2019).  
582 Dimensionality reduction for visualizing single-cell data using UMAP. *Nat. Biotechnol.* 37,  
583 38–47. doi:10.1038/nbt.4314.
- 584 Beverdam, A., and Koopman, P. (2006). Expression profiling of purified mouse gonadal somatic  
585 cells during the critical time window of sex determination reveals novel candidate genes for  
586 human sexual dysgenesis syndromes. *Hum. Mol. Genet.* 15, 417–431.  
587 doi:10.1093/hmg/ddi463.
- 588 Bitgood, M. J., Shen, L., and McMahon, A. P. (1996). Sertoli cell signaling by Desert hedgehog  
589 regulates the male germline. *Curr. Biol.* 6, 298–304. doi:10.1016/S0960-9822(02)00480-3.
- 590 Bowles, J., Feng, C. W., Ineson, J., Miles, K., Spiller, C. M., Harley, V. R., et al. (2018). Retinoic  
591 Acid Antagonizes Testis Development in Mice. *Cell Rep.* 24, 1330–1341.  
592 doi:10.1016/j.celrep.2018.06.111.
- 593 Bowles, J., Knight, D., Smith, C., Wilhelm, D., Richman, J., Mamiya, S., et al. (2006). Retinoid

- 594 Signaling Determines Germ Cell Fate in Mice. *Science* (80-. ). 312, 596–600.  
595 doi:10.1126/science.1125691.
- 596 Brennan, J., Tilmann, C., and Capel, B. (2003). Pdgfr-alpha mediates testis cord organization and  
597 fetal Leydig cell development in the XY gonad. *Genes Dev.* 17, 800–810.  
598 doi:10.1101/gad.1052503.
- 599 Buaas, F. W., Gardiner, J. R., Clayton, S., Val, P., and Swain, A. (2012). In vivo evidence for the  
600 crucial role of SF1 in steroidproducing cells of the testis, ovary and adrenal gland. *Dev.* 139,  
601 4561–4570. doi:10.1242/dev.087247.
- 602 Byskov, A. G. (1986). Differential of mammalian embryonic gonad. *Physiol. Rev.* 66, 71–117.  
603 doi:10.1152/physrev.1986.66.1.71.
- 604 Castrillon, D. H., Quade, B. J., Wang, T. Y., Quigley, C., and Crum, C. P. (2000). The human  
605 VASA gene is specifically expressed in the germ cell lineage. *Proc. Natl. Acad. Sci. U. S. A.*  
606 97, 9585–90. doi:10.1073/pnas.160274797.
- 607 Chen, H., Gao, L., Xiong, Y., Yang, D., Li, C., Wang, A., et al. (2017). Circadian clock and  
608 steroidogenic-related gene expression profiles in mouse Leydig cells following  
609 dexamethasone stimulation. *Biochem. Biophys. Res. Commun.* 483, 294–300.  
610 doi:10.1016/j.bbrc.2016.12.149.
- 611 Chen, H., Ge, R.-S. S., and Zirkin, B. R. (2009). Leydig cells: From stem cells to aging. *Mol. Cell.*  
612 *Endocrinol.* 306, 9–16. doi:10.1016/j.mce.2009.01.023.
- 613 Chen, L. Y., Brown, P. R., Willis, W. B., and Eddy, E. M. (2014). Peritubular myoid cells  
614 participate in male mouse spermatogonial stem cell maintenance. *Endocrinology* 155, 4964–  
615 4974. doi:10.1210/en.2014-1406.
- 616 Davidoff, M. S., Middendorff, R., Enikolopov, G., Riethmacher, D., Holstein, A. F., and Müller,  
617 D. (2004). Progenitor cells of the testosterone-producing Leydig cells revealed. *J. Cell Biol.*  
618 167, 935–44. doi:10.1083/jcb.200409107.
- 619 De Val, S., and Black, B. L. (2009). Transcriptional Control of Endothelial Cell Development. *Dev.*  
620 *Cell* 16, 180–195. doi:10.1016/j.devcel.2009.01.014.
- 621 Ernst, C., Eling, N., Martinez-Jimenez, C. P., Marioni, J. C., and Odom, D. T. (2019). Staged  
622 developmental mapping and X chromosome transcriptional dynamics during mouse  
623 spermatogenesis. *Nat. Commun.* 10, 1–20. doi:10.1038/s41467-019-09182-1.
- 624 Grabski, D. F., Broseus, L., Kumari, B., Rekosh, D., Hammarskjold, M., and Ritchie, W. (2021).

- 625 Intron retention and its impact on gene expression and protein diversity: A review and a  
626 practical guide. *WIREs RNA* 12, e1631. doi:10.1002/wrna.1631.
- 627 Habert, R., Lejeune, H., and Saez, J. M. (2001). Origin, differentiation and regulation of fetal and  
628 adult Leydig cells. *Mol. Cell. Endocrinol.* 179, 47–74. doi:10.1016/S0303-7207(01)00461-0.
- 629 Haider, S. G. (2004). Cell Biology of Leydig Cells in the Testis. *Int. Rev. Cytol.* 233, 181–241.  
630 doi:10.1016/S0074-7696(04)33005-6.
- 631 Huang, B. M., Stocco, D. M., Hutson, J. C., and Norman, R. L. (1995). Corticotropin-releasing  
632 hormone stimulates steroidogenesis in mouse Leydig cells. *Biol. Reprod.* 53, 620–626.  
633 doi:10.1095/biolreprod53.3.620.
- 634 Huhtaniemi, I., and Pelliniemi, L. J. (1992). Fetal Leydig Cells: Cellular Origin, Morphology, Life  
635 Span, and Special Functional Features. *Exp. Biol. Med.* 201, 125–140. doi:10.3181/00379727-  
636 201-43493.
- 637 Inoue, M., Shima, Y., Miyabayashi, K., Tokunaga, K., Sato, T., Baba, T., et al. (2016). Isolation  
638 and Characterization of Fetal Leydig Progenitor Cells of Male Mice. *Endocrinology* 157,  
639 1222–1233. doi:10.1210/en.2015-1773.
- 640 Jameson, S. A., Natarajan, A., Cool, J., DeFalco, T., Maatouk, D. M., Mork, L., et al. (2012).  
641 Temporal transcriptional profiling of somatic and germ cells reveals biased lineage priming  
642 of sexual fate in the fetal mouse gonad. *PLoS Genet.* 8, e1002575.  
643 doi:10.1371/journal.pgen.1002575.
- 644 Kalsotra, A., and Cooper, T. A. (2011). Functional consequences of developmentally regulated  
645 alternative splicing. *Nat. Rev. Genet.* 12, 715–729. doi:10.1038/nrg3052.
- 646 Kendall, S. K., Samuelson, L. C., Saunders, T. L., Wood, R. I., and Camper, S. A. (1995). Targeted  
647 disruption of the pituitary glycoprotein hormone  $\alpha$ -subunit produces hypogonadal and  
648 hypothyroid mice. *Genes Dev.* 9, 2007–2019. doi:10.1101/gad.9.16.2007.
- 649 Kerr, J. B. B., Risbridger, G. P. P., and Knell, C. M. M. (1988). Stimulation of interstitial cell  
650 growth after selective destruction of foetal Leydig cells in the testis of postnatal rats. *Cell*  
651 *Tissue Res.* 252, 89–98. doi:10.1007/BF00213829.
- 652 Kilcoyne, K. R., Smith, L. B., Atanassova, N., Macpherson, S., McKinnell, C., van den Driesche,  
653 S., et al. (2014). Fetal programming of adult Leydig cell function by androgenic effects on  
654 stem/progenitor cells. *Proc. Natl. Acad. Sci.* 111, E1924–E1932.  
655 doi:10.1073/pnas.1320735111.

- 656 Koubova, J., Menke, D. B., Zhou, Q., Cape, B., Griswold, M. D., Page, D. C., et al. (2006). Retinoic  
657 acid regulates sex-specific timing of meiotic initiation in mice. *Proc. Natl. Acad. Sci. U. S. A.*  
658 103, 2474–2479. doi:10.1073/pnas.0510813103.
- 659 Kumar, A., D’Souza, S. S., Moskvina, O. V., Toh, H., Wang, B., Zhang, J., et al. (2017).  
660 Specification and Diversification of Pericytes and Smooth Muscle Cells from  
661 Mesenchymoangioblasts. *Cell Rep.* 19, 1902–1916. doi:10.1016/j.celrep.2017.05.019.
- 662 Lei, Z. M., Mishra, S., Zou, W., Xu, B., Foltz, M., Li, X., et al. (2001). Targeted Disruption of  
663 Luteinizing Hormone/Human Chorionic Gonadotropin Receptor Gene. *Mol. Endocrinol.* 15,  
664 184–200. doi:10.1210/mend.15.1.0586.
- 665 Liu, C., Rodriguez, K., and Yao, H. H. C. H.-C. (2016). Mapping lineage progression of somatic  
666 progenitor cells in the mouse fetal testis. *Development* 143, dev.135756.  
667 doi:10.1242/dev.135756.
- 668 Love, M. I., Huber, W., and Anders, S. (2014). Moderated estimation of fold change and dispersion  
669 for RNA-seq data with DESeq2. *Genome Biol.* 15, 550. doi:10.1186/s13059-014-0550-8.
- 670 Ma, X., Dong, Y., Matzuk, M. M., and Kumar, T. R. (2004). Targeted disruption of luteinizing  
671 hormone  $\beta$ -subunit leads to hypogonadism, defects in gonadal steroidogenesis, and  
672 infertility. *Proc. Natl. Acad. Sci. U. S. A.* 101, 17294–17299. doi:10.1073/pnas.0404743101.
- 673 Marco-Sola, S., Sammeth, M., Guigó, R., and Ribeca, P. (2012). The GEM mapper: Fast, accurate  
674 and versatile alignment by filtration. *Nat. Methods* 9, 1185–1188. doi:10.1038/nmeth.2221.
- 675 McClelland, K. S., Bell, K., Larney, C., Harley, V. R., Sinclair, A. H., Oshlack, A., et al. (2015).  
676 Purification and Transcriptomic Analysis of Mouse Fetal Leydig Cells Reveals Candidate  
677 Genes for Specification of Gonadal Steroidogenic Cells1. *Biol. Reprod.* 92, 145–145.  
678 doi:10.1095/biolreprod.115.128918.
- 679 McDowell, E. N., Kisielewski, A. E., Pike, J. W., Franco, H. L., Yao, H. H.-C., and Johnson, K. J.  
680 (2012). A Transcriptome-Wide Screen for mRNAs Enriched in Fetal Leydig Cells: CRHR1  
681 Agonism Stimulates Rat and Mouse Fetal Testis Steroidogenesis. *PLoS One* 7, e47359.  
682 doi:10.1371/journal.pone.0047359.
- 683 Migrenne, S., Pairault, C., Racine, C., Livera, G., Géloso, A., and Habert, R. (2001). Luteinizing  
684 hormone-dependent activity and luteinizing hormone-independent differentiation of rat fetal  
685 Leydig cells. *Mol. Cell. Endocrinol.* 172, 193–202. doi:10.1016/S0303-7207(00)00339-7.
- 686 Miyabayashi, K., Shima, Y., Inoue, M., Sato, T., Baba, T., Ohkawa, Y., et al. (2017). Alterations

- 687 in Fetal Leydig Cell Gene Expression during Fetal and Adult Development. *Sex. Dev.* 11, 53–  
688 63. doi:10.1159/000453323.
- 689 Mucenski, M. L., Mahoney, R., Adam, M., Potter, A. S., and Potter, S. S. (2019). Single cell RNA-  
690 seq study of wild type and Hox9,10,11 mutant developing uterus. *Sci. Rep.* 9, 4557.  
691 doi:10.1038/s41598-019-40923-w.
- 692 Müller-McNicoll, M., Rossbach, O., Hui, J., and Medenbach, J. (2019). Auto-regulatory feedback  
693 by RNA-binding proteins. *J. Mol. Cell Biol.* 11, 930–939. doi:10.1093/jmcb/mjz043.
- 694 Munger, S. C., Natarajan, A., Looger, L. L., Ohler, U., and Capel, B. (2013). Fine time course  
695 expression analysis identifies cascades of activation and repression and maps a putative  
696 regulator of mammalian sex determination. *PLoS Genet.* 9, e1003630.  
697 doi:10.1371/journal.pgen.1003630.
- 698 Nef, S., Schaad, O., Stallings, N. R., Cederroth, C. R., Pitetti, J.-L. L., Schaer, G., et al. (2005).  
699 Gene expression during sex determination reveals a robust female genetic program at the onset  
700 of ovarian development. *Dev. Biol.* 287, 361–77. doi:10.1016/j.ydbio.2005.09.008.
- 701 Neirijnck, Y., Kühne, F., Mayère, C., Pavlova, E., Sararols, P., Foti, M., et al. (2019). Tumor  
702 suppressor PTEN regulates negatively sertoli cell proliferation, testis size, and sperm  
703 production in vivo. *Endocrinology* 160. doi:10.1210/en.2018-00892.
- 704 O’Shaughnessy, P. J., Baker, P. J., Heikkilä, M., Vainio, S., and McMahon, A. P. (2000).  
705 Localization of 17 $\beta$ -Hydroxysteroid Dehydrogenase/17-Ketosteroid Reductase Isoform  
706 Expression in the Developing Mouse Testis—Androstenedione Is the Major Androgen  
707 Secreted by Fetal/Neonatal Leydig Cells\*. *Endocrinology* 141, 2631–2637.  
708 doi:10.1210/endo.141.7.7545.
- 709 O’Shaughnessy, P. J., Baker, P., Sohnius, U., Haavisto, A.-M. M., Charlton, H. M., and  
710 Huhtaniemi, I. (1998). Fetal Development of Leydig Cell Activity in the Mouse Is  
711 Independent of Pituitary Gonadotroph Function\*. *Endocrinology* 139, 1141–1146.  
712 doi:10.1210/endo.139.3.5788.
- 713 O’Shaughnessy, P. J., Fleming, L. M., Jackson, G., Hochgeschwender, U., Reed, P., and Baker, P.  
714 J. (2003). Adrenocorticotrophic Hormone Directly Stimulates Testosterone Production by the  
715 Fetal and Neonatal Mouse Testis. *Endocrinology* 144, 3279–3284. doi:10.1210/en.2003-  
716 0277.
- 717 O’Shaughnessy, P. J., and Fowler, P. A. (2011). Endocrinology of the mammalian fetal testis.



- 718        *Reproduction* 141, 37–46. doi:10.1530/REP-10-0365.
- 719 O’Shaughnessy, P. J., Monteiro, A., Fowler, P. A., and Morris, I. D. (2014). Identification of  
720        Leydig cell-specific mRNA transcripts in the adult rat testis. *Reproduction* 147, 671–682.  
721        doi:10.1530/REP-13-0603.
- 722 O’Shaughnessy, P. J., Willerton, L., and Baker, P. J. (2002). Changes in Leydig Cell Gene  
723        Expression During Development in the Mouse<sup>1</sup>. *Biol. Reprod.* 66, 966–975.  
724        doi:10.1095/biolreprod66.4.966.
- 725 Odet, F., Verot, A., and Le Magueresse-Battistoni, B. (2006). The Mouse Testis Is the Source of  
726        Various Serine Proteases and Serine Proteinase Inhibitors (SERPINs): Serine Proteases and  
727        SERPINs Identified in Leydig Cells Are under Gonadotropin Regulation. *Endocrinology* 147,  
728        4374–4383. doi:10.1210/en.2006-0484.
- 729 Okamura, D., Tokitake, Y., Niwa, H., and Matsui, Y. (2008). Requirement of Oct3/4 function for  
730        germ cell specification. *Dev. Biol.* 317, 576–584. doi:10.1016/J.YDBIO.2008.03.002.
- 731 Pakarinen, P., Kimura, S., El-Gehani, F., Pelliniemi, L. J., and Huhtaniemi, I. (2002). Pituitary  
732        hormones are not required for sexual differentiation of male mice: Phenotype of the  
733        T/ebp/Nkx2.1 null mutant mice. *Endocrinology* 143, 4477–4482. doi:10.1210/en.2002-  
734        220052.
- 735 Park, J. W., Fu, S., Huang, B., and Xu, R.-H. (2020). Alternative splicing in mesenchymal stem  
736        cell differentiation. *Stem Cells* 38, 1229–1240. doi:10.1002/stem.3248.
- 737 Pitetti, J.-L., Calvel, P., Romero, Y., Conne, B., Truong, V., Papaioannou, M. D., et al. (2013).  
738        Insulin and IGF1 Receptors Are Essential for XX and XY Gonadal Differentiation and  
739        Adrenal Development in Mice. *PLoS Genet.* 9, e1003160. doi:10.1371/journal.pgen.1003160.
- 740 Polański, K., Young, M. D., Miao, Z., Meyer, K. B., Teichmann, S. A., and Park, J.-E. (2019).  
741        BBKNN: fast batch alignment of single cell transcriptomes. *Bioinformatics.*  
742        doi:10.1093/bioinformatics/btz625.
- 743 Rebourcet, D., Mackay, R., Darbey, A., Curley, M. K., Jørgensen, A., Frederiksen, H., et al. (2020).  
744        Ablation of the canonical testosterone production pathway via knockout of the steroidogenic  
745        enzyme HSD17B3, reveals a novel mechanism of testicular testosterone production. *FASEB*  
746        *J.* 34, 10373–10386. doi:10.1096/fj.202000361R.
- 747 Rebourcet, D., Monteiro, A., Cruickshanks, L., Jeffery, N., Smith, S., Milne, L., et al. (2019).  
748        Relationship of transcriptional markers to Leydig cell number in the mouse testis. *PLoS One*

- 749 14, e0219524. doi:10.1371/journal.pone.0219524.
- 750 Rebourcet, D., O'Shaughnessy, P. J., Monteiro, A., Milne, L., Cruickshanks, L., Jeffrey, N., et al.  
751 (2014). Sertoli Cells Maintain Leydig Cell Number and Peritubular Myoid Cell Activity in  
752 the Adult Mouse Testis. *PLoS One* 9, e105687. doi:10.1371/journal.pone.0105687.
- 753 Rehman, Z. ur, Worku, T., Davis, J. S., Talpur, H. S., Bhattarai, D., Kadariya, I., et al. (2017). Role  
754 and mechanism of AMH in the regulation of Sertoli cells in mice. *J. Steroid Biochem. Mol.*  
755 *Biol.* 174, 133–140. doi:10.1016/j.jsbmb.2017.08.011.
- 756 Revil, T., Gaffney, D., Dias, C., Majewski, J., and Jerome-Majewska, L. A. (2010). Alternative  
757 splicing is frequent during early embryonic development in mouse. *BMC Genomics* 11, 399.  
758 doi:10.1186/1471-2164-11-399.
- 759 Sanz, E., Evanoff, R., Quintana, A., Evans, E., Miller, J. A., Ko, C., et al. (2013). RiboTag Analysis  
760 of Actively Translated mRNAs in Sertoli and Leydig Cells In Vivo. *PLoS One* 8, e66179.  
761 doi:10.1371/journal.pone.0066179.
- 762 Shen, S., Park, J. W., Huang, J., Dittmar, K. A., Lu, Z. X., Zhou, Q., et al. (2012). MATS: A  
763 Bayesian framework for flexible detection of differential alternative splicing from RNA-Seq  
764 data. *Nucleic Acids Res.* 40, e61–e61. doi:10.1093/nar/gkr1291.
- 765 Shen, S., Park, J. W., Lu, Z. X., Lin, L., Henry, M. D., Wu, Y. N., et al. (2014). rMATS: Robust  
766 and flexible detection of differential alternative splicing from replicate RNA-Seq data. *Proc.*  
767 *Natl. Acad. Sci. U. S. A.* 111, E5593–E5601. doi:10.1073/pnas.1419161111.
- 768 Shen, Y., Larose, H., Shami, A. N., Moritz, L., Manske, G., Ma, Q., et al. (2020). Tcf21 +  
769 mesenchymal cells contribute to testis somatic cell development, homeostasis, and  
770 regeneration. *bioRxiv*, 2020.05.02.074518. doi:10.1101/2020.05.02.074518.
- 771 Shima, Y. (2019). Development of fetal and adult Leydig cells. *Reprod. Med. Biol.* 18, 323–330.  
772 doi:10.1002/rmb2.12287.
- 773 Shima, Y., Miyabayashi, K., Haraguchi, S., Arakawa, T., Otake, H., Baba, T., et al. (2013).  
774 Contribution of Leydig and Sertoli cells to testosterone production in mouse fetal testes. *Mol.*  
775 *Endocrinol.* 27, 63–73. doi:10.1210/me.2012-1256.
- 776 Shima, Y., Miyabayashi, K., Sato, T., Suyama, M., Ohkawa, Y., Doi, M., et al. (2018). Fetal Leydig  
777 cells dedifferentiate and serve as adult Leydig stem cells. *Development* 145, dev169136.  
778 doi:10.1242/dev.169136.
- 779 Slow, S., Lever, M., Chambers, S. T., and George, P. M. (2009). Plasma dependent and

- 780 independent accumulation of betaine in male and female rat tissues. *Physiol. Res.* 58, 403–  
781 410.
- 782 Song, W.-C. (2007). “The Role of Estrogen Sulfotransferase in Leydig Cells,” in *The Leydig Cell*  
783 *in Health and Disease* (Humana Press), 197–205. doi:10.1007/978-1-59745-453-7\_14.
- 784 Stallings, N. R. (2002). Development of a Transgenic Green Fluorescent Protein Lineage Marker  
785 for Steroidogenic Factor 1. *Mol. Endocrinol.* 16, 2360–2370. doi:10.1210/me.2002-0003.
- 786 Stévant, I., Neirijnck, Y., Borel, C., Escoffier, J., Smith, L. B., Antonarakis, S. E., et al. (2018).  
787 Deciphering Cell Lineage Specification during Male Sex Determination with Single-Cell  
788 RNA Sequencing. *Cell Rep.* 22, 1589–1599. doi:10.1016/j.celrep.2018.01.043.
- 789 Subramanian, A., Tamayo, P., Mootha, V. K., Mukherjee, S., Ebert, B. L., Gillette, M. A., et al.  
790 (2005). Gene set enrichment analysis: A knowledge-based approach for interpreting genome-  
791 wide expression profiles. *Proc. Natl. Acad. Sci. U. S. A.* 102, 15545–15550.  
792 doi:10.1073/pnas.0506580102.
- 793 Teerds, K. J., and Huhtaniemi, I. T. (2015). Morphological and functional maturation of Leydig  
794 cells: From rodent models to primates. *Hum. Reprod. Update* 21, 310–328.  
795 doi:10.1093/humupd/dmv008.
- 796 Wakayama, T., Hamada, K., Yamamoto, M., Suda, T., and Iseki, S. (2003). The expression of  
797 platelet endothelial cell adhesion molecule-1 in mouse primordial germ cells during their  
798 migration and early gonadal formation. *Histochem. Cell Biol.* 119, 355–362.  
799 doi:10.1007/s00418-003-0528-1.
- 800 Waltman, L., and van Eck, N. J. (2013). A smart local moving algorithm for large-scale modularity-  
801 based community detection. *Eur. Phys. J. B* 86, 471. doi:10.1140/epjb/e2013-40829-0.
- 802 Wen, Q., Cheng, C. Y. Y., and Liu, Y.-X. X. (2016). Development, function and fate of fetal Leydig  
803 cells. *Semin. Cell Dev. Biol.* 59, 89–98. doi:10.1016/j.semcdb.2016.03.003.
- 804 Wen, Q., Zheng, Q.-S., Li, X.-X., Hu, Z.-Y., Gao, F., Cheng, C. Y., et al. (2014). Wt1 dictates the  
805 fate of fetal and adult Leydig cells during development in the mouse testis. *Am. J. Physiol.*  
806 *Endocrinol. Metab.* 307, E1131-43. doi:10.1152/ajpendo.00425.2014.
- 807 Yu, G., Wang, L.-G., Han, Y., and He, Q.-Y. (2012). clusterProfiler: an R package for comparing  
808 biological themes among gene clusters. *OMICS* 16, 284–7. doi:10.1089/omi.2011.0118.
- 809 Yu, Z., Ji, P., Cao, J., Zhu, S., Li, Y., Zheng, L., et al. (2009). Dazl Promotes Germ Cell  
810 Differentiation from Embryonic Stem Cells. *J. Mol. Cell Biol.* 1, 93–103.

811           doi:10.1093/jmcb/mjp026.

812   Zhang, F.-P., Poutanen, M., Wilbertz, J., and Huhtaniemi, I. (2001). Normal Prenatal but Arrested  
813       Postnatal Sexual Development of Luteinizing Hormone Receptor Knockout (LuRKO) Mice.  
814       *Mol. Endocrinol.* 15, 172–183. doi:10.1210/mend.15.1.0582.

815

816

817

818 **Tables**

819

**Table 1. FLC specific genes**

| Gene           | baseMean | log2FoldChange | Fold Change | p value   | p adj     |
|----------------|----------|----------------|-------------|-----------|-----------|
| <i>Gsg1l</i>   | 6 453    | 5,109          | 34,511      | 2,69E-295 | 2,54E-292 |
| <i>Crhr1</i>   | 3 887    | 10,022         | 1 039,829   | 4,24E-191 | 1,31E-188 |
| <i>Cyp26b1</i> | 23 010   | 6,389          | 83,795      | 1,96E-109 | 1,70E-107 |
| <i>Pcsk6</i>   | 2 697    | 4,599          | 24,240      | 1,38E-56  | 3,84E-55  |
| <i>Ren1</i>    | 24 384   | 5,091          | 34,091      | 1,11E-29  | 1,31E-28  |
| <i>Vsn1l</i>   | 168      | 10,669         | 1 627,844   | 1,54E-17  | 1,02E-16  |
| <i>Ppp2r5b</i> | 8 531    | 1,116          | 2,168       | 1,18E-15  | 6,91E-15  |
| <i>Nppc</i>    | 307      | 3,352          | 10,212      | 2,17E-14  | 1,17E-13  |
| <i>Cdon</i>    | 28 637   | 2,341          | 5,067       | 1,88E-05  | 4,58E-05  |

820

821

822

**Table 2. ALC specific genes**

| Gene             | baseMean | log2FoldChange | Fold Change | p value   | p adj     |
|------------------|----------|----------------|-------------|-----------|-----------|
| <i>C2</i>        | 18 052   | -4,944         | 0,032       | 0         | 0         |
| <i>Gpt2</i>      | 35 274   | -5,798         | 0,018       | 0         | 0         |
| <i>Amy1</i>      | 3 372    | -6,032         | 0,015       | 0         | 0         |
| <i>Bhmt</i>      | 20 022   | -9,792         | 0,001       | 0         | 0         |
| <i>Hsd17b3</i>   | 18 581   | -9,798         | 0,001       | 1,74E-281 | 1,39E-278 |
| <i>Aqp2</i>      | 2 982    | -7,231         | 0,007       | 4,42E-245 | 2,15E-242 |
| <i>Prps2</i>     | 4 552    | -3,749         | 0,074       | 2,18E-209 | 8,13E-207 |
| <i>Ces1d</i>     | 11 984   | -5,741         | 0,019       | 2,83E-205 | 9,87E-203 |
| <i>Glb1l2</i>    | 4 513    | -7,003         | 0,008       | 2,53E-199 | 8,47E-197 |
| <i>Lgals3bp</i>  | 20 133   | -6,373         | 0,012       | 1,14E-198 | 3,73E-196 |
| <i>Serpina3c</i> | 3 338    | -4,255         | 0,052       | 1,48E-188 | 4,40E-186 |
| <i>Gpd1</i>      | 3 897    | -6,797         | 0,009       | 1,39E-179 | 3,79E-177 |
| <i>Stxbp3a</i>   | 4 244    | -3,010         | 0,124       | 3,20E-162 | 6,75E-160 |
| <i>Klf15</i>     | 2 929    | -3,176         | 0,111       | 9,87E-156 | 1,69E-153 |
| <i>Figf</i>      | 3 069    | -4,574         | 0,042       | 7,10E-154 | 1,18E-151 |
| <i>Sdsl</i>      | 1 122    | -4,313         | 0,050       | 2,78E-150 | 4,37E-148 |
| <i>Acox3</i>     | 8 398    | -3,121         | 0,115       | 4,46E-131 | 5,19E-129 |
| <i>Snx10</i>     | 2 540    | -6,134         | 0,014       | 1,75E-126 | 1,90E-124 |
| <i>Il17rb</i>    | 1 514    | -3,448         | 0,092       | 3,59E-122 | 3,74E-120 |
| <i>Kcnk1</i>     | 2 467    | -3,389         | 0,095       | 3,32E-114 | 3,04E-112 |
| <i>Sult1e1</i>   | 2 879    | -10,672        | 0,001       | 1,02E-108 | 8,80E-107 |
| <i>Vcam1</i>     | 46 596   | -5,777         | 0,018       | 3,45E-107 | 2,87E-105 |
| <i>Slc7a11</i>   | 4 286    | -5,998         | 0,016       | 1,12E-104 | 8,95E-103 |

|                  |        |         |       |          |          |
|------------------|--------|---------|-------|----------|----------|
| <i>Serpina3n</i> | 2 169  | -10,261 | 0,001 | 6,47E-87 | 3,75E-85 |
| <i>Hsd3b6</i>    | 32 837 | -11,130 | 0,000 | 8,96E-78 | 4,48E-76 |
| <i>Klk1b24</i>   | 3 178  | -11,822 | 0,000 | 1,09E-75 | 5,12E-74 |
| <i>Gm11744</i>   | 1 030  | -3,358  | 0,098 | 2,68E-74 | 1,21E-72 |
| <i>Hpgd</i>      | 1 068  | -4,030  | 0,061 | 2,07E-61 | 6,54E-60 |
| <i>Rhbg</i>      | 2 881  | -12,255 | 0,000 | 2,48E-60 | 7,62E-59 |
| <i>Serpina3g</i> | 462    | -5,205  | 0,027 | 1,89E-58 | 5,51E-57 |
| <i>Lbp</i>       | 3 087  | -8,037  | 0,004 | 9,19E-54 | 2,39E-52 |
| <i>Adhfe1</i>    | 1 626  | -2,181  | 0,220 | 1,71E-49 | 3,93E-48 |
| <i>Spon1</i>     | 8 151  | -9,477  | 0,001 | 4,49E-47 | 9,60E-46 |
| <i>Paqr6</i>     | 391    | -5,686  | 0,019 | 6,54E-47 | 1,39E-45 |
| <i>Dcxr</i>      | 1 124  | -3,278  | 0,103 | 8,51E-46 | 1,77E-44 |
| <i>Nat8</i>      | 725    | -4,189  | 0,055 | 7,05E-42 | 1,28E-40 |
| <i>Klk1b21</i>   | 5 524  | -11,869 | 0,000 | 2,96E-40 | 5,07E-39 |
| <i>Rarres1</i>   | 2 641  | -8,946  | 0,002 | 2,68E-39 | 4,42E-38 |
| <i>Retsat</i>    | 14 826 | -3,468  | 0,090 | 9,21E-37 | 1,40E-35 |
| <i>Bpifb5</i>    | 1 962  | -4,132  | 0,057 | 1,77E-35 | 2,60E-34 |
| <i>Cml1</i>      | 533    | -2,338  | 0,198 | 2,78E-34 | 3,89E-33 |
| <i>Adck3</i>     | 7 476  | -2,174  | 0,222 | 3,28E-32 | 4,23E-31 |
| <i>Lrg1</i>      | 1 040  | -11,788 | 0,000 | 5,26E-30 | 6,29E-29 |
| <i>Cml5</i>      | 687    | -3,956  | 0,064 | 5,53E-29 | 6,33E-28 |
| <i>Eppin</i>     | 472    | -12,500 | 0,000 | 1,31E-25 | 1,33E-24 |
| <i>Klk1b27</i>   | 3 990  | -13,693 | 0,000 | 3,32E-25 | 3,31E-24 |
| <i>Espn</i>      | 1 912  | -1,994  | 0,251 | 5,15E-23 | 4,63E-22 |
| <i>C1rl</i>      | 902    | -2,248  | 0,211 | 7,72E-22 | 6,55E-21 |
| <i>Asgr1</i>     | 79     | -6,078  | 0,015 | 3,07E-20 | 2,39E-19 |
| <i>Serpina5</i>  | 22 933 | -1,330  | 0,398 | 0,004924 | 0,008635 |

823

824 **Figure legends**

825

826 **Figure 1: Similarities and differences between FLCs and ALCs**

827 (A) Sample collection, RNA-sequencing and analysis workflow. (B) Venn diagram showing the  
828 number of genes expressed at same levels in FLCs and ALCs (12,645 genes), enriched in FLCs  
829 (3,741 genes) and enriched in ALCs (4,657 genes). (C) Volcano plot displaying differential  
830 expressed genes between FLCs and ALCs. The x-axis corresponds to the  $\log_2(\text{Fold Change})$  and  
831 the y-axis corresponds to the  $-\log_{10}(\text{adjusted p-value})$ . The salmon dots represent the significant  
832 up-regulated transcripts in FLCs (adj. pval<0.01); the blue dots represent the significant up-  
833 regulated transcripts in ALCs (adj. pval<0.01) and the grey dots represent the the not significantly  
834 differentially expressed transcripts (adj. pval>0.01). Top 30 genes according to the adjusted p-value  
835 are displaying on this volcano plot. (D) Heatmap displaying the normalized scaled expression of  
836 differentially expressed genes in the 6 samples. Genes are ordered with hierarchical clustering  
837 according to their expression pattern into 15 groups.

838

839 **Figure 2: Alternative splicing**

840 (A) Proportion of the differential alternative splicing events found in fetal and adult Leydig cells.  
841 (B, C & D) GO term enrichment of the biological functions in genes showing differential skipping  
842 exons in fetal and adult Leydig cells (B, C), and intron retention in fetal Leydig cells (D).

843

844 **Figure 3: Classification of cell populations in single-cell RNA sequencing data of fetal and  
845 adult mouse testis**

846 (A) UMAP representation of single-cell transcriptomes colored by cell type, where each dot  
847 corresponds to one cell. Enlargement of the global UMAP on the area of interest which include  
848 both the fetal and adult Leydig, colored by cell populations (A') and by developmental stage (C).  
849 The fetal cells are colored in pale green and the adult cells in dark green. (D, E) Enlargement on  
850 the UMAP representation colored according to the normalized expression of Leydig cells marker  
851 genes *Hsd3b1* (D) and *Cyp11a1* (E). (B) Dotplot displaying the expression of selected marker  
852 genes of testis cell populations. The size of the dots is proportional to the fraction of cells in the  
853 population expressing the gene and the scaled gene expression level is indicated by the color scale.  
854 Leydig cells: *Nr5a1*, *Star*, *Cyp11a1*. Sertoli cells: *Hsd17b3*, *Amhg*, *Sox9*. Interstitial progenitors:

855 *Arx, Lhx9, Nr2f2*. Endothelial cells: *Pecam1, Cdh5, Esam*. Germ cells: *Pou5f1, Ddx4*.  
856 Spermatogonia: *Dmrt1*. Spermatoocytes: *Piwill1*. Round spermatids: *Tex21*. Elongating spermatids:  
857 *Tnp1*.

858

#### 859 **Figure 4: Identification of genes labelling FLCs**

860 **(A, A')** UMAP representation of single-cell transcriptomes highlighting the two Leydig cell  
861 populations: fetal Leydig cells (FLCs) in pink and adult Leydig cells (ALCs) in grey pink. The  
862 other populations of the testis are colored in grey. **(C-G)** Enlargement on the UMAP representation  
863 colored according to the normalized expression of selected FLC-specific candidate marker genes,  
864 like *Crhr1* **(C)**, *Ren1* **(D)**, *Vsnl1* **(E)**, *Cyp26b1* **(F)**, and *Mc2r* **(G)**. **(B)** Dotplot displaying the scaled  
865 expression of the FLC-specific candidate genes, and the top 15 non-specific candidates  
866 discriminating FLCs over ALCs. **(H-K)** *In situ* hybridization assay by RNAscope® labelling in red  
867 *Star*, a known marker of Leydig cells, and in green the FLC marker *Ren1* **(H, I)** and *Crhr1* **(J, K)**  
868 in embryonic mouse testis at E18.5 **(H, J)** and in adult mouse testis at P100 **(I, K)**. The  
869 colocalisation of the red and green probes indicate a co-expression of the two genes in the Leydig  
870 cells. The black scale bar corresponds to 100µm.

871

#### 872 **Figure 5: Identification of genes labelling ALCs**

873 **(A, A')** UMAP representation of single-cell transcriptomes highlighting the two Leydig cell  
874 populations: fetal Leydig cells (FLCs) in pink and adult Leydig cells (ALCs) in pale violet. The  
875 other populations of the testis are colored in grey. **(C-G)** Enlargement on the UMAP representation  
876 colored according to the normalized expression of selected ALC-specific candidate marker genes,  
877 like *Bhmt* **(C)**, *Sult1e1* **(D)**, *Lrg1* **(E)**, *Serpina3n* **(F)**, and *Klk1b27* **(G)**. **(B)** Dotplot displaying the  
878 scaled expression of the top 25 ALC-specific candidate genes. **(H-K)** *In situ* hybridization assay  
879 by RNAscope® labelling in red *Star*, a known marker of Leydig cells, and in green the ALC marker  
880 *Bhmt* **(H, I)** and *Sult1e1* **(J, K)** in adult mouse testis at P100 **(H, J)** and in embryonic mouse testis  
881 at E18.5 **(I, K)**. The colocalisation of the red and green probes indicate a co-expression of the two  
882 genes in the Leydig cells. The black scale bar corresponds to 100µm.

883

#### 884 **Figure 6: Dual and sequential model of steroidogenesis regulation**

885 Drawing recapitulating the similarities and differences between FLCs (left panel) and ALCs (right



886 panel). The expression of the ACTH receptor (encoded by *Mc2r*) and the CRH receptor (encoded  
887 by *Crhr1*) in FLCs suggests that the regulation of androgen production is mediated by LH, CRH  
888 and CRH, while in the absence of CRH and ACTH receptors in ALCs the regulation is exclusively  
889 under the control of LH.

890

### 891 **Supplementary Figure 1:**

892 **(A,A')** Scatter plot showing the selection of Leydig cells (GFP+++ ) by FACS in E18.5 **(A)** and in  
893 P100 **(A')** testis cell suspension. The X axis corresponds to the GFP florescence level and the Y  
894 axis forward scatter area explaining the granularity of the events. **(B)** Heatmap showing the  
895 normalized scaled expression of selected marker genes in our three replicates at E18.5 (pale green)  
896 and in our three replicates at P100 (dark green). The color is representative of the expression level.  
897 The gene expression confirmed the purity of the samples in Leydig cells. *Cyp11a1*, *Star*, *Nr5a1*,  
898 *Hsd3b1*, *Insl3*, *Cyp17a1*, *Hsd17b3*, *eGFP*: Leydig cells. *Cdh5*, *Pecam1*, *Acta2*, *Rgs5*: Endothelial  
899 cells. *Pdgfra*, *Tcf21*, *Wnt5a*, *Nr2f2*: Interstitial progenitors. *Amh*, *Lhx9*, *Dhh*, *Sox9*: Sertoli cells.  
900 *Pou5f1*, *Mael*, *Dadx4*, *Dazl*: Germ cells. **(C)** Heatmap showing the Spearman correlation score  
901 between the six Leydig cells samples. The score is indicated by the color scale. **(D)** Principal  
902 Component Analysis (PCA) plot where each dot corresponds to a Leydig cells sample. The dots  
903 are colored according to the sample type. E18.5: pale green; P100: dark green.

904

### 905 **Supplementary Figure 2:**

906 Immuno-histochemistry (IHC) staining on mouse fetal and adult testis. The DNA is colored in  
907 white, HSD3B labels Leydig cells in green and BHMT is colored in red. The white scale bar  
908 corresponds to 50µm.

909

910

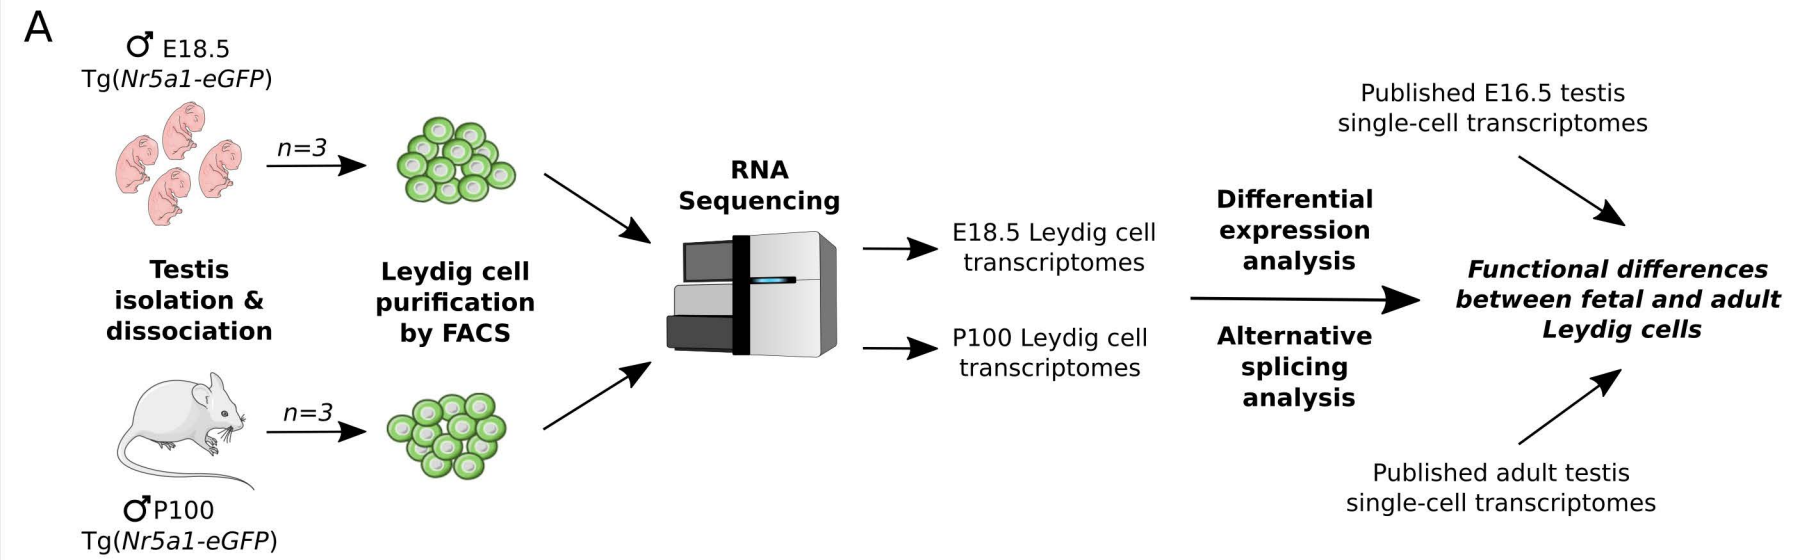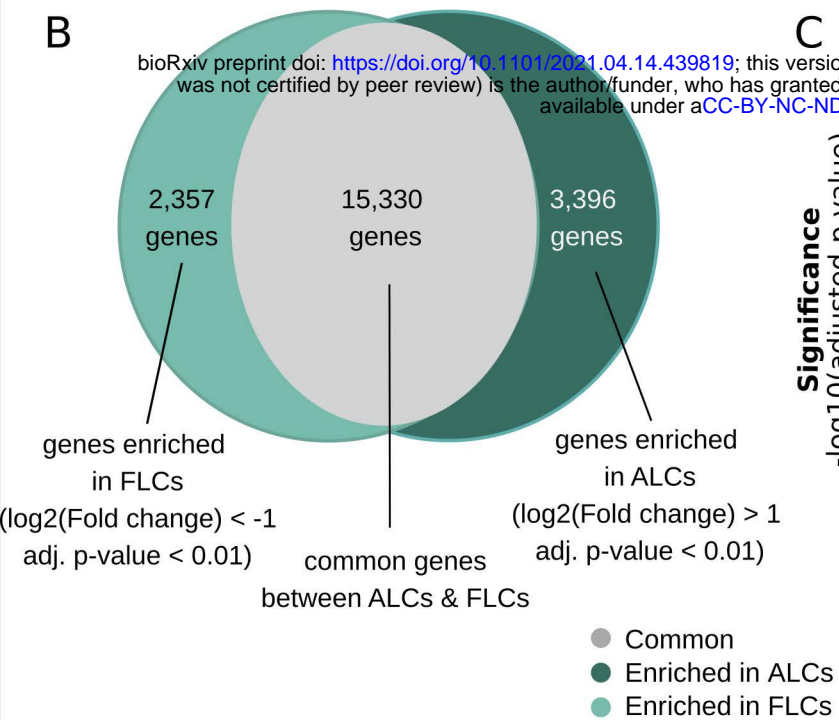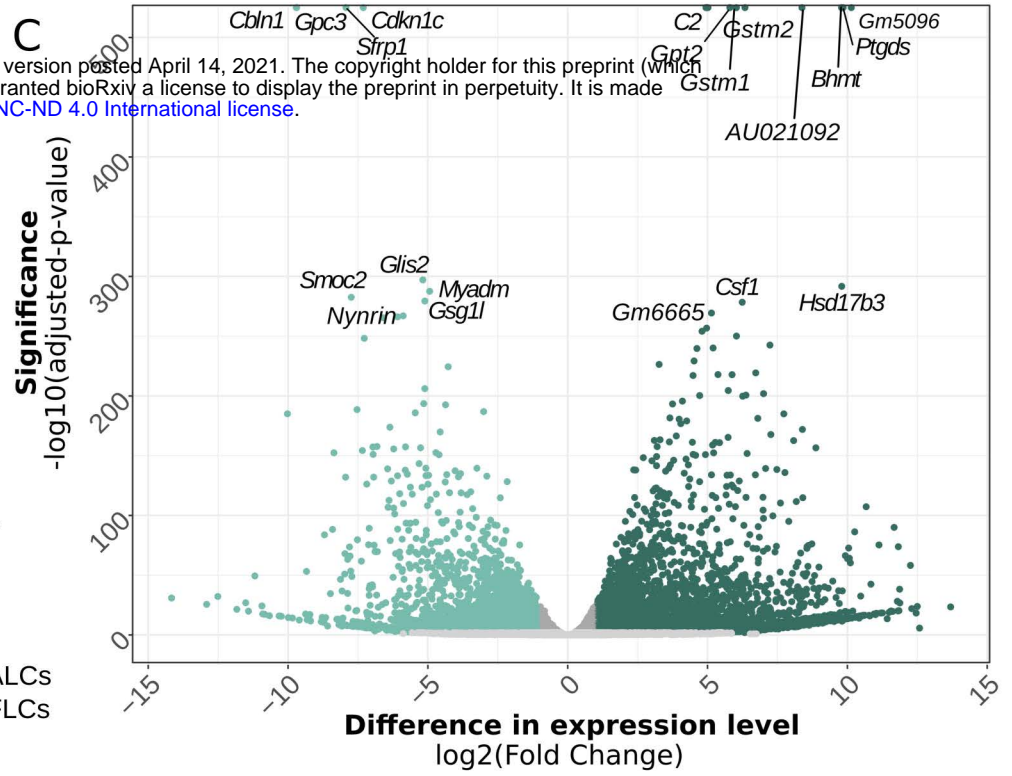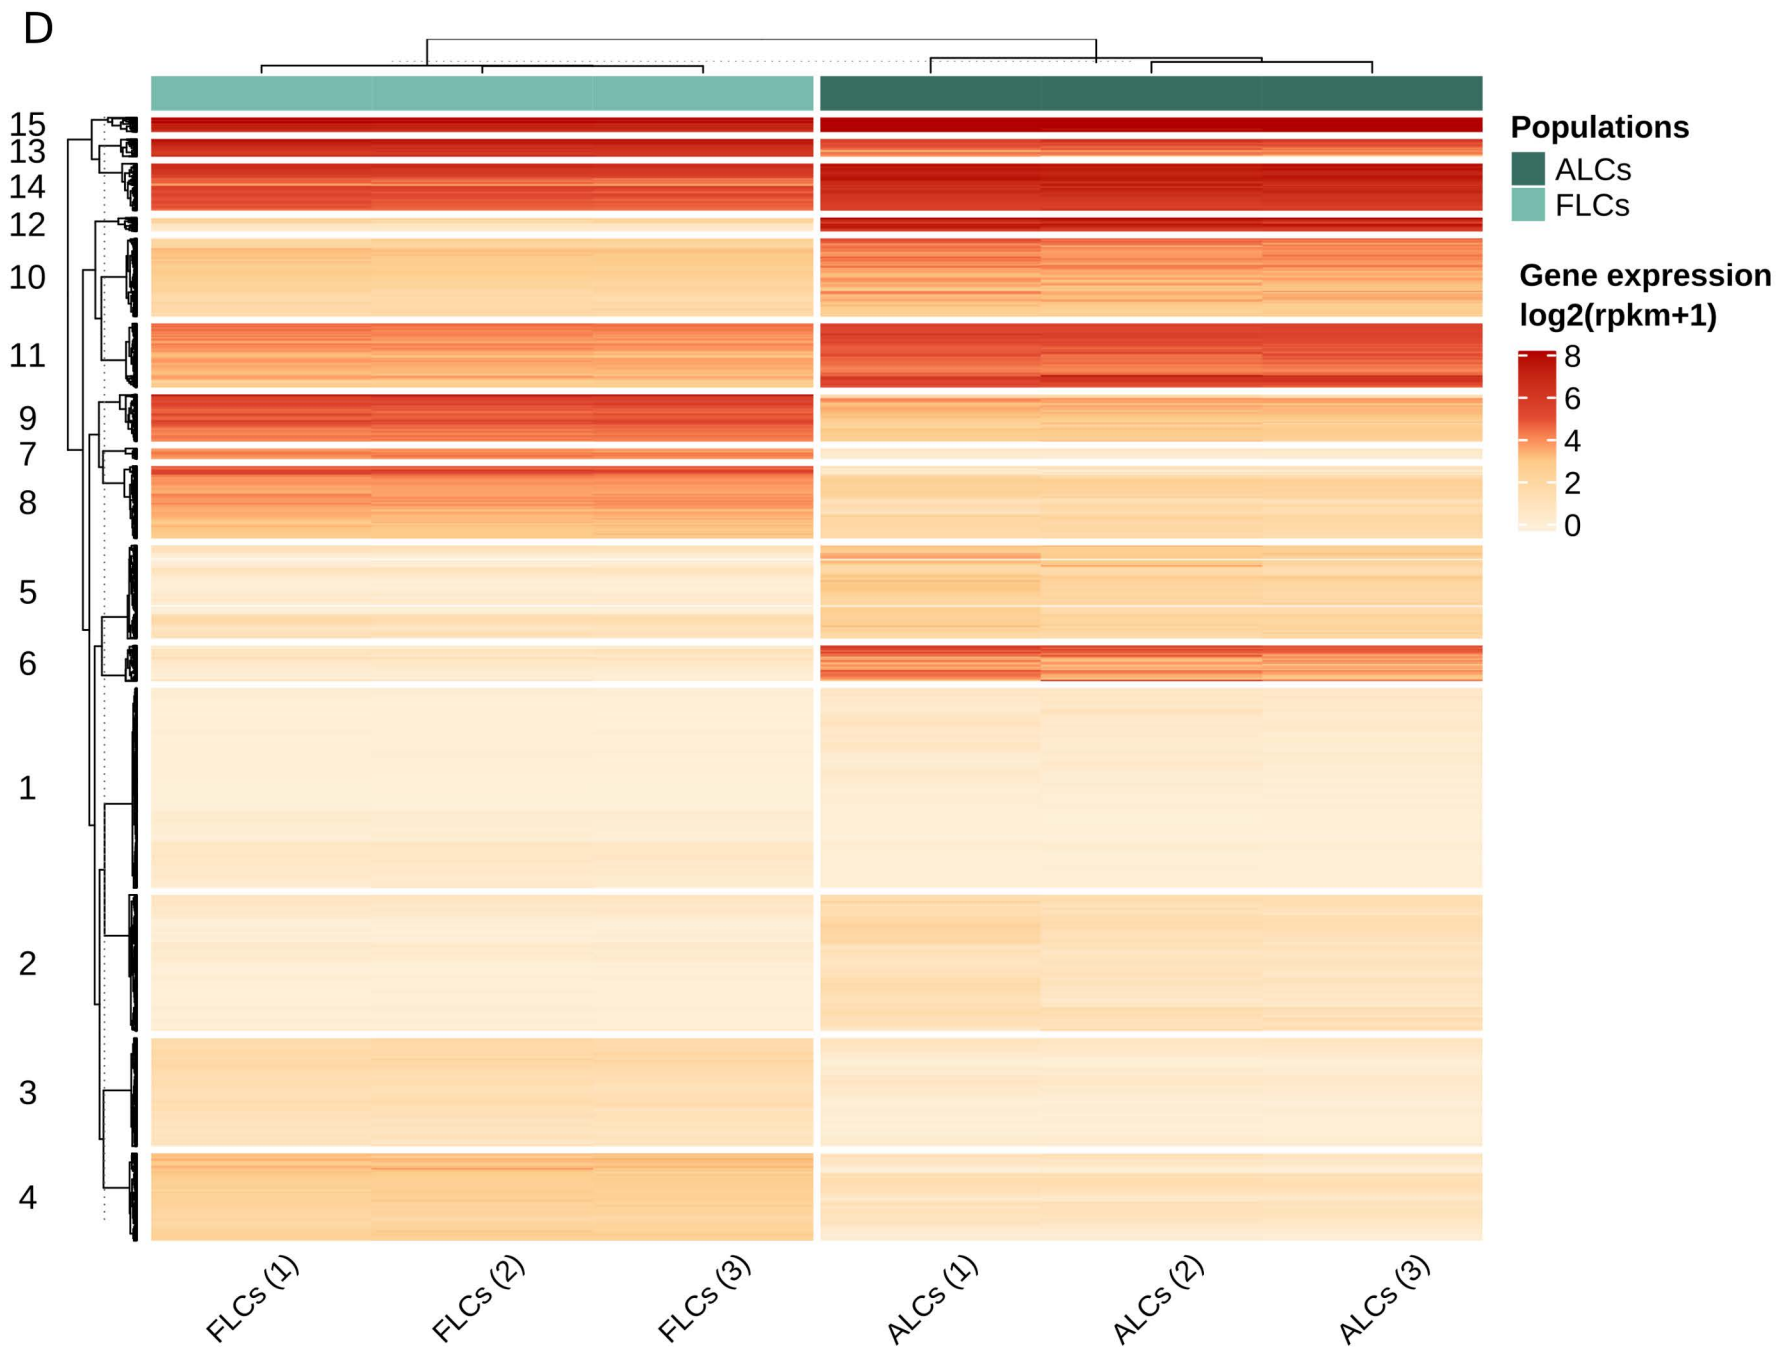

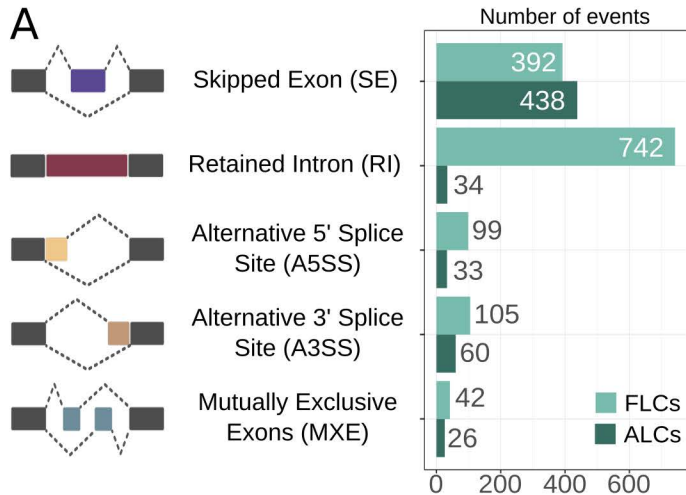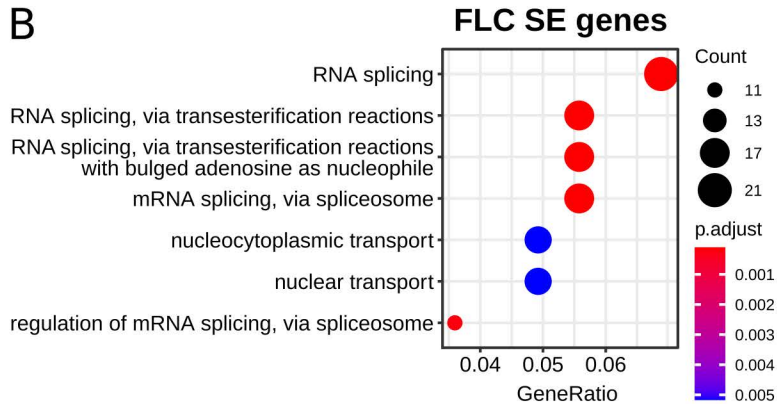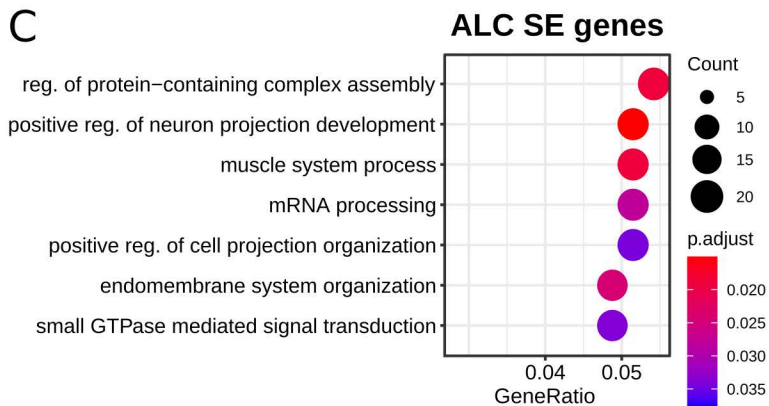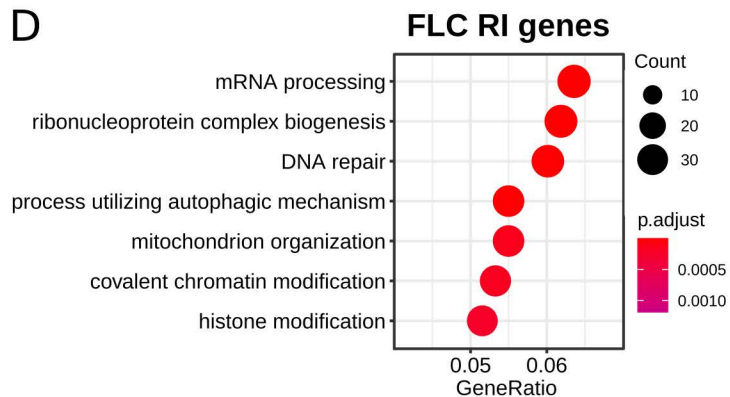

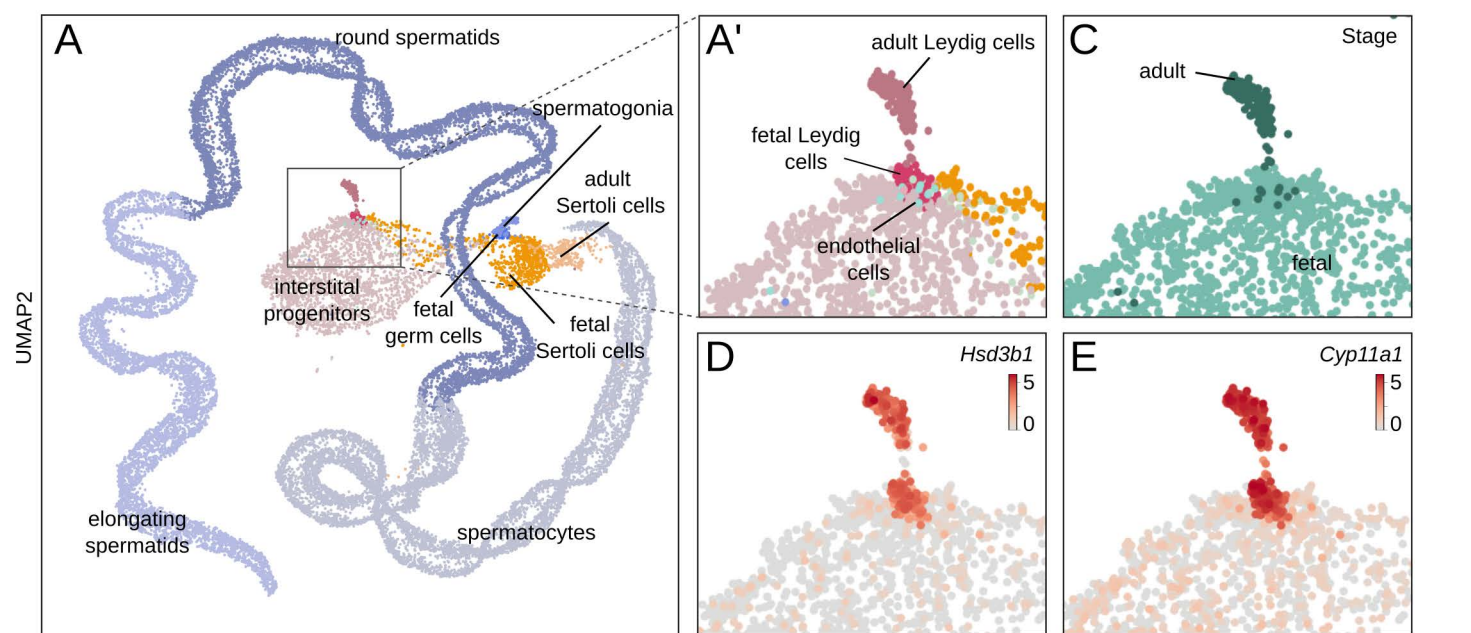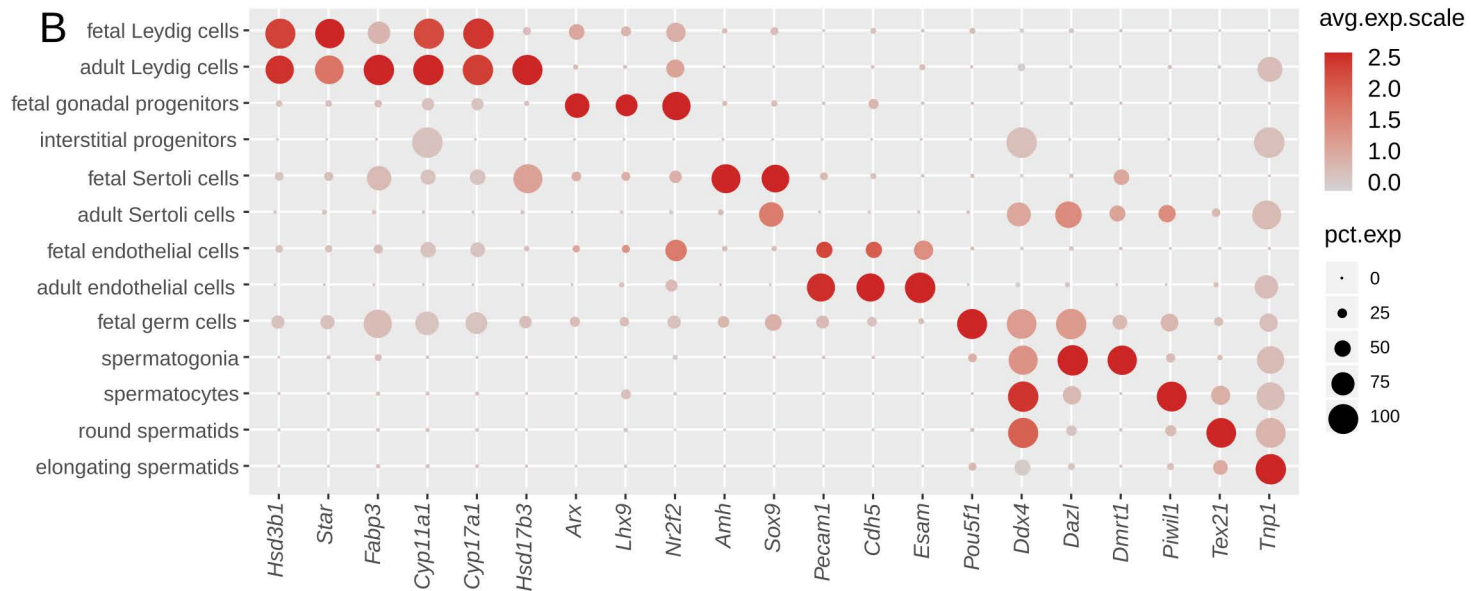

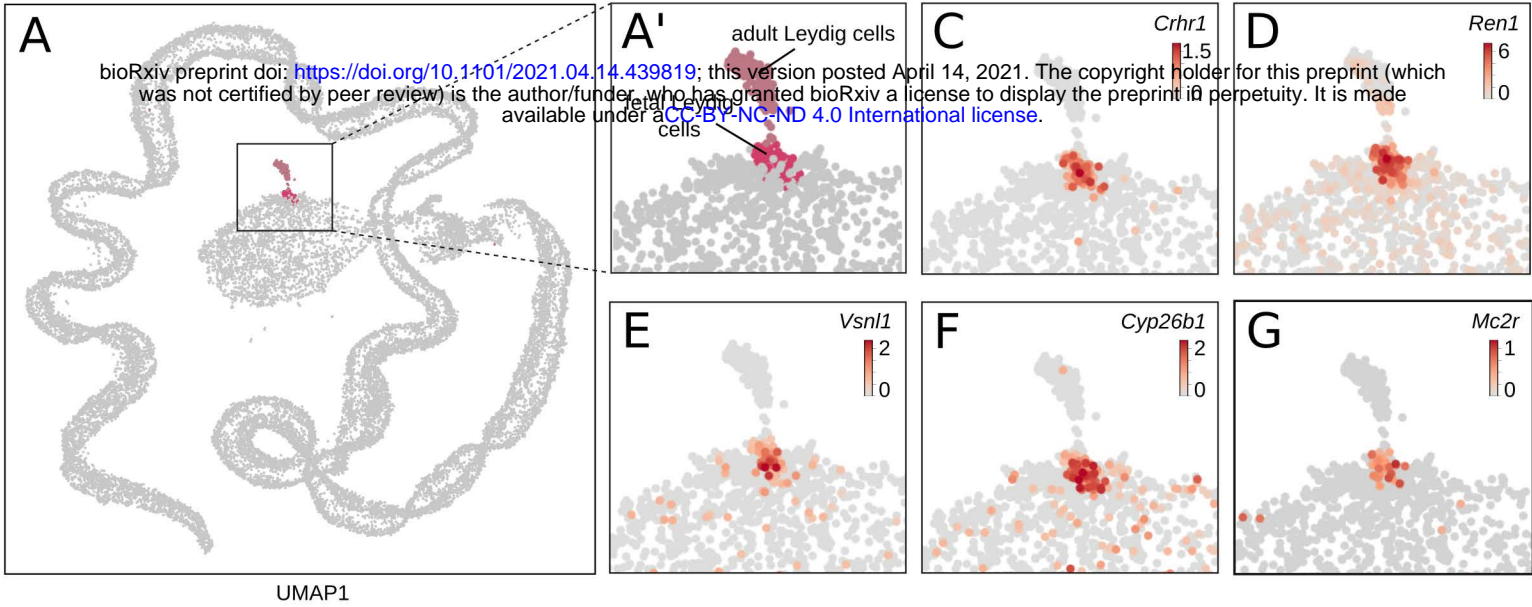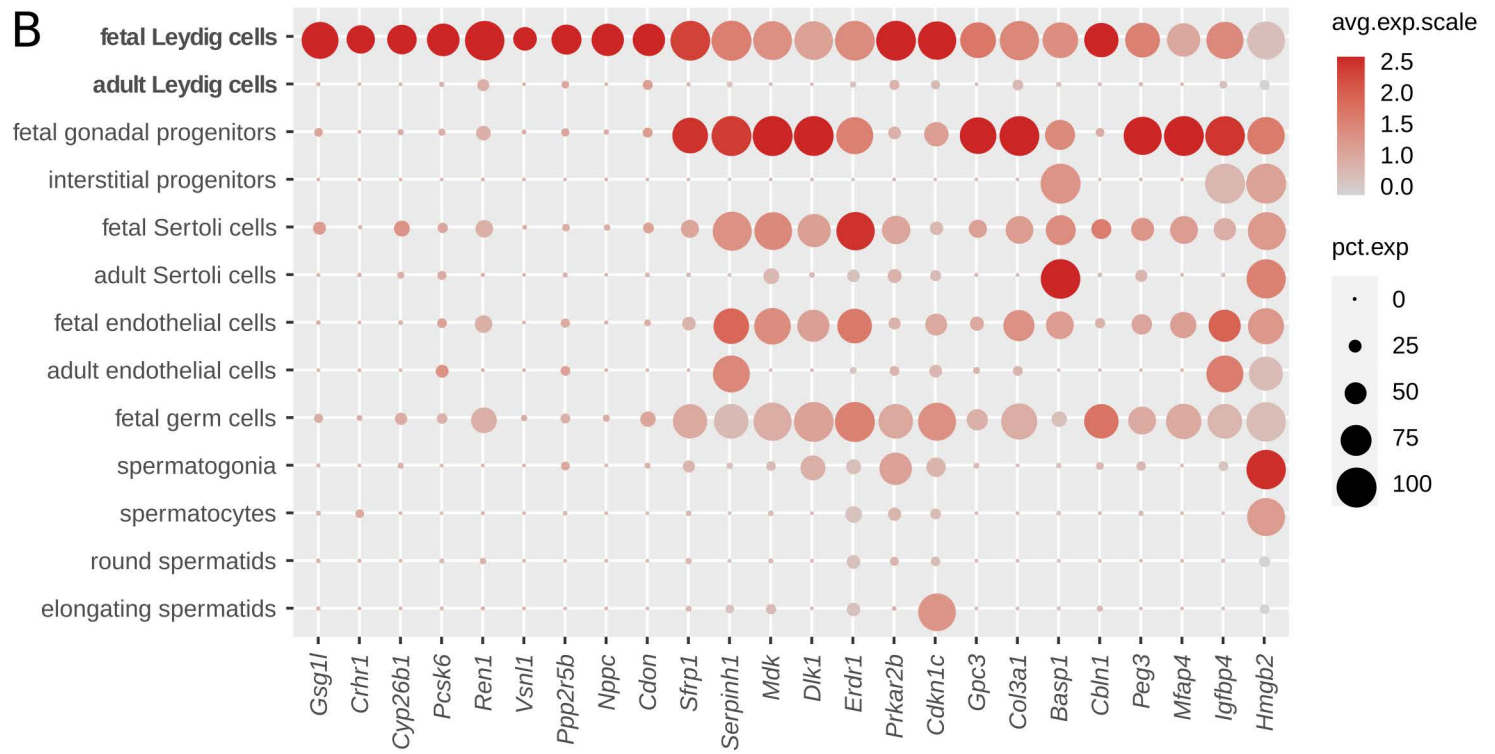

**Fetal mouse testis (E16.5)**

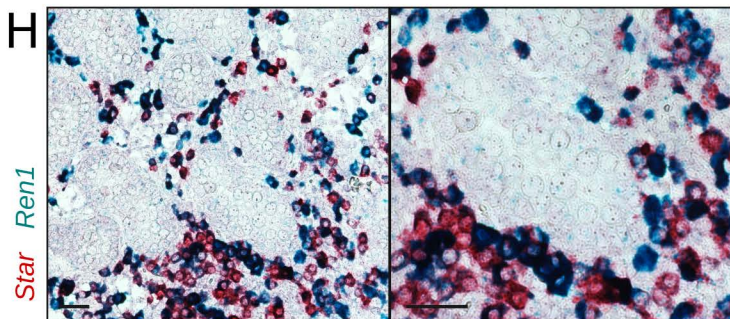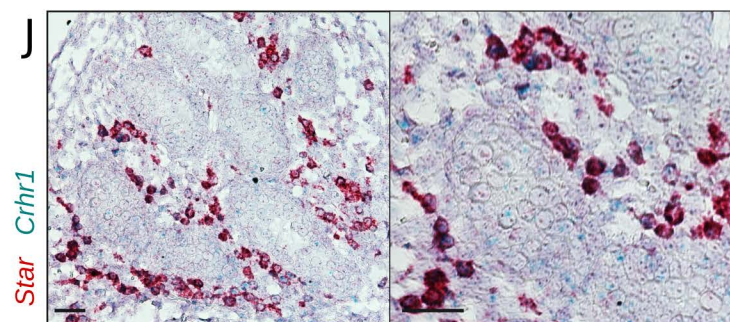

**Adult mouse testis (P100)**

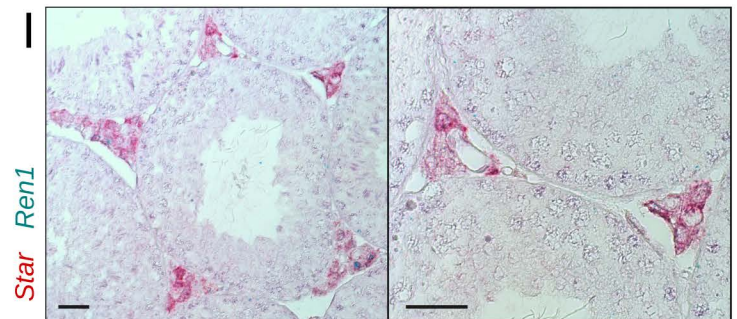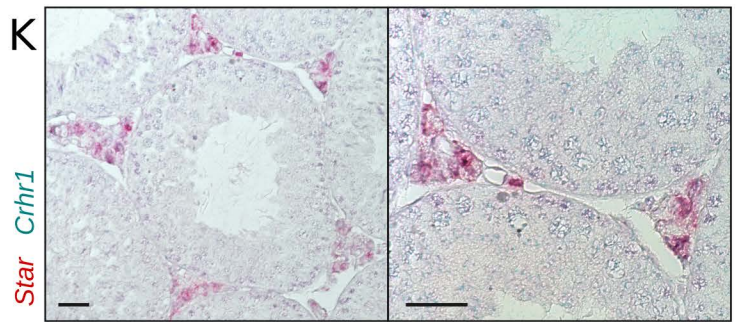

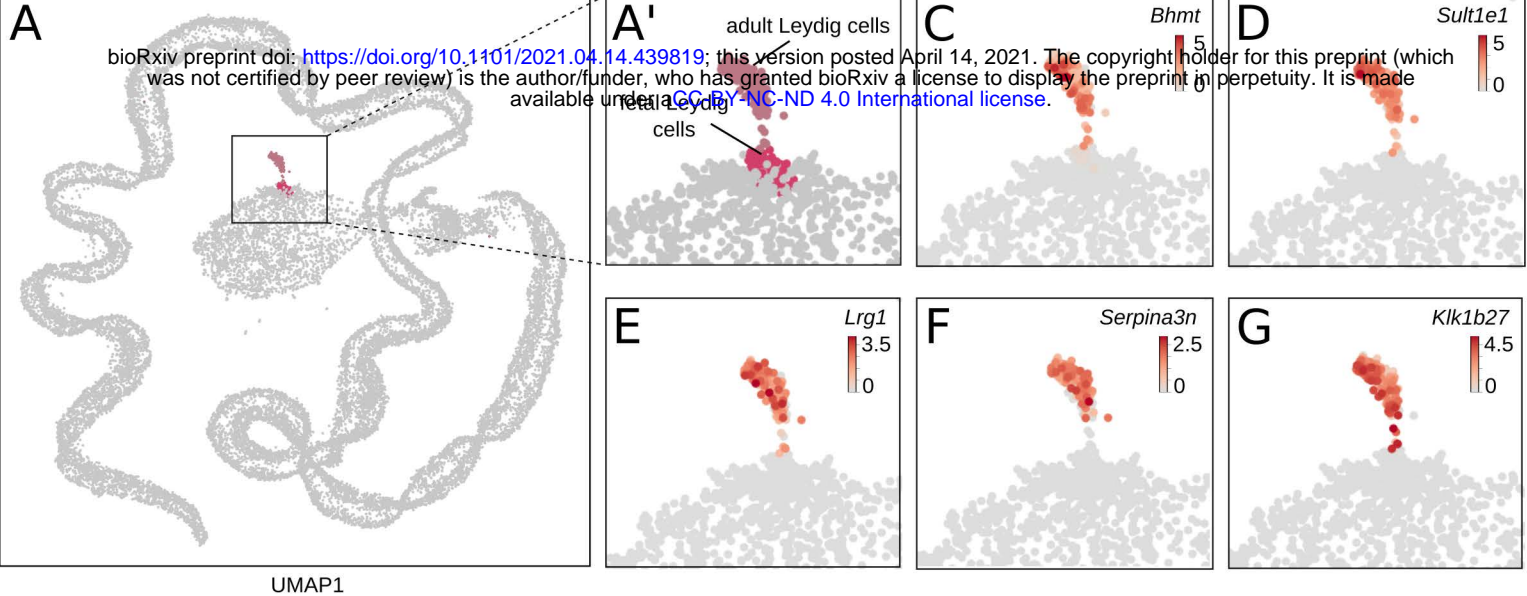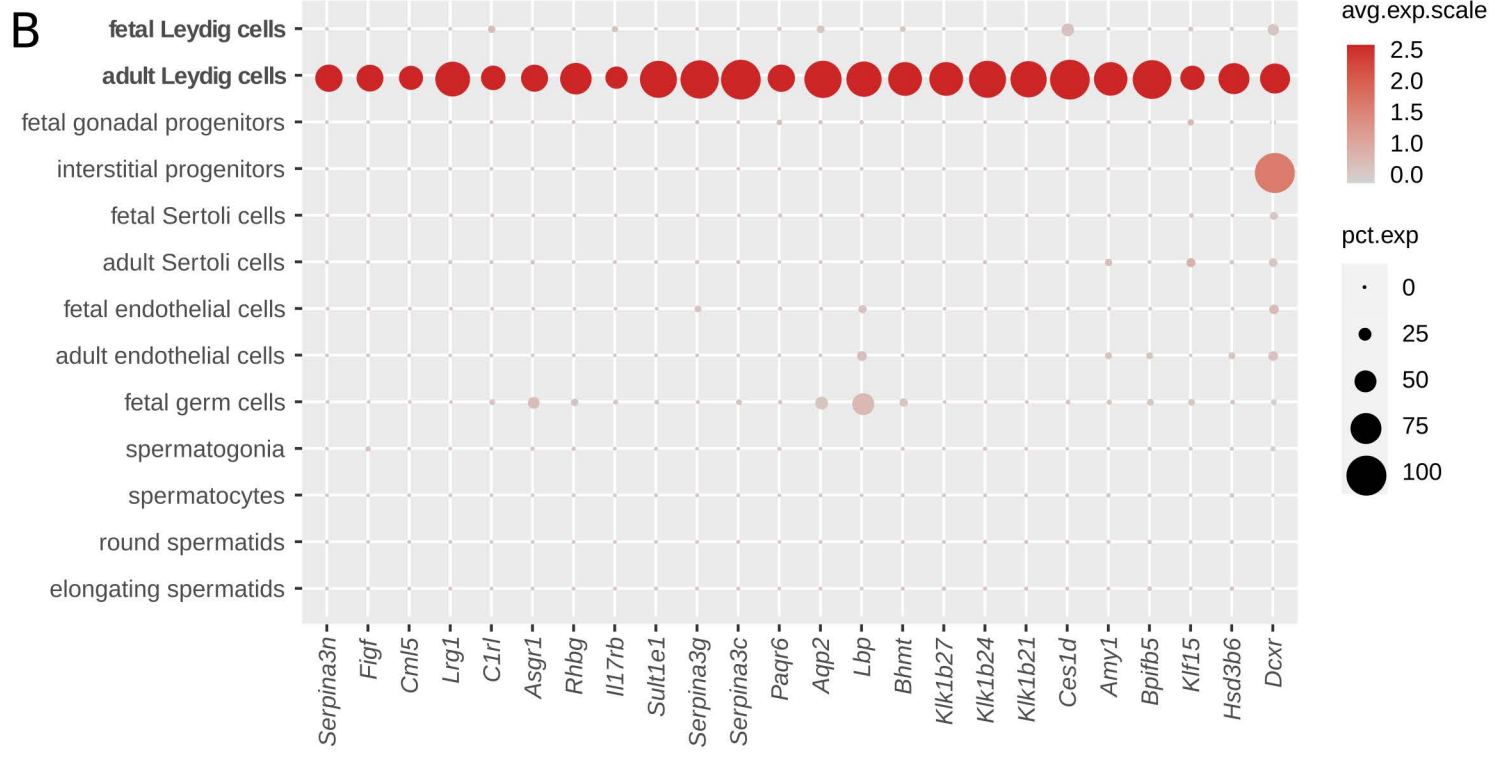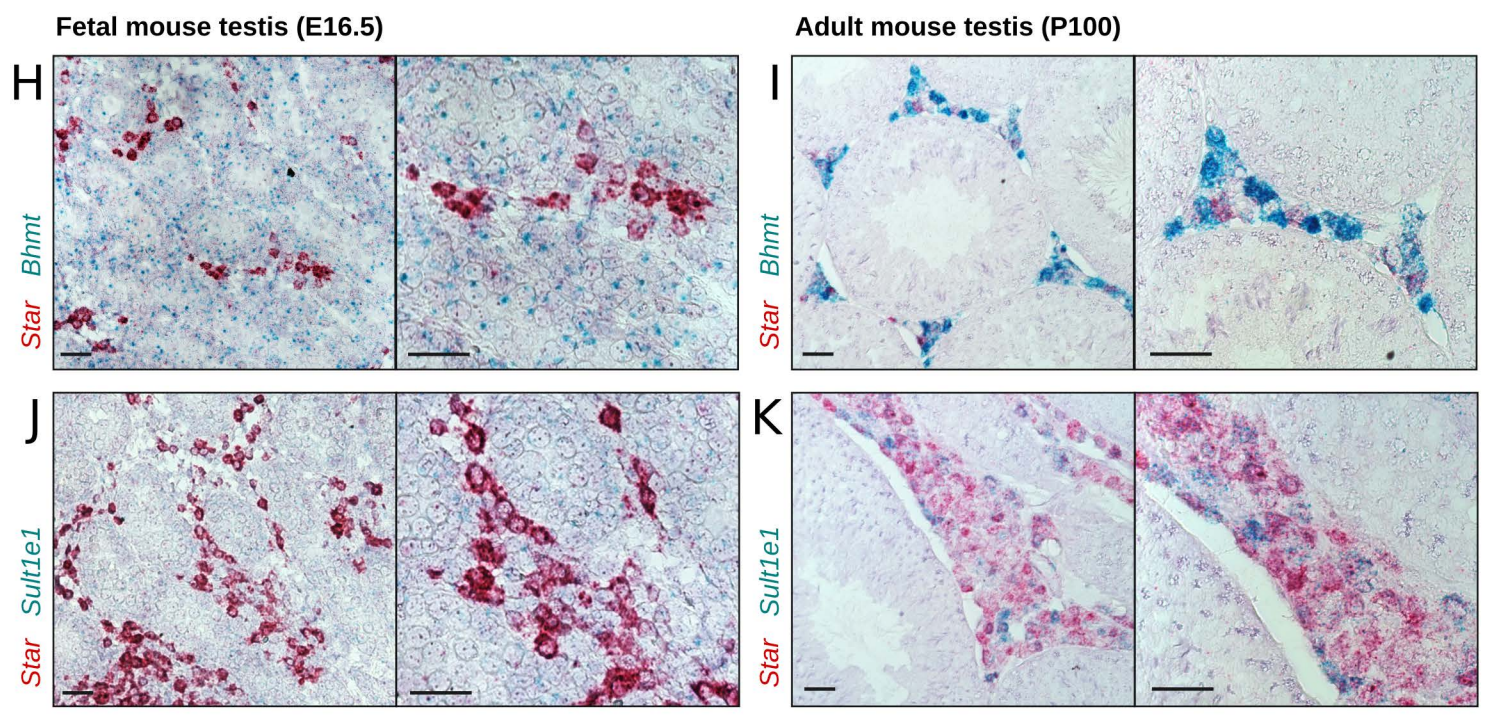

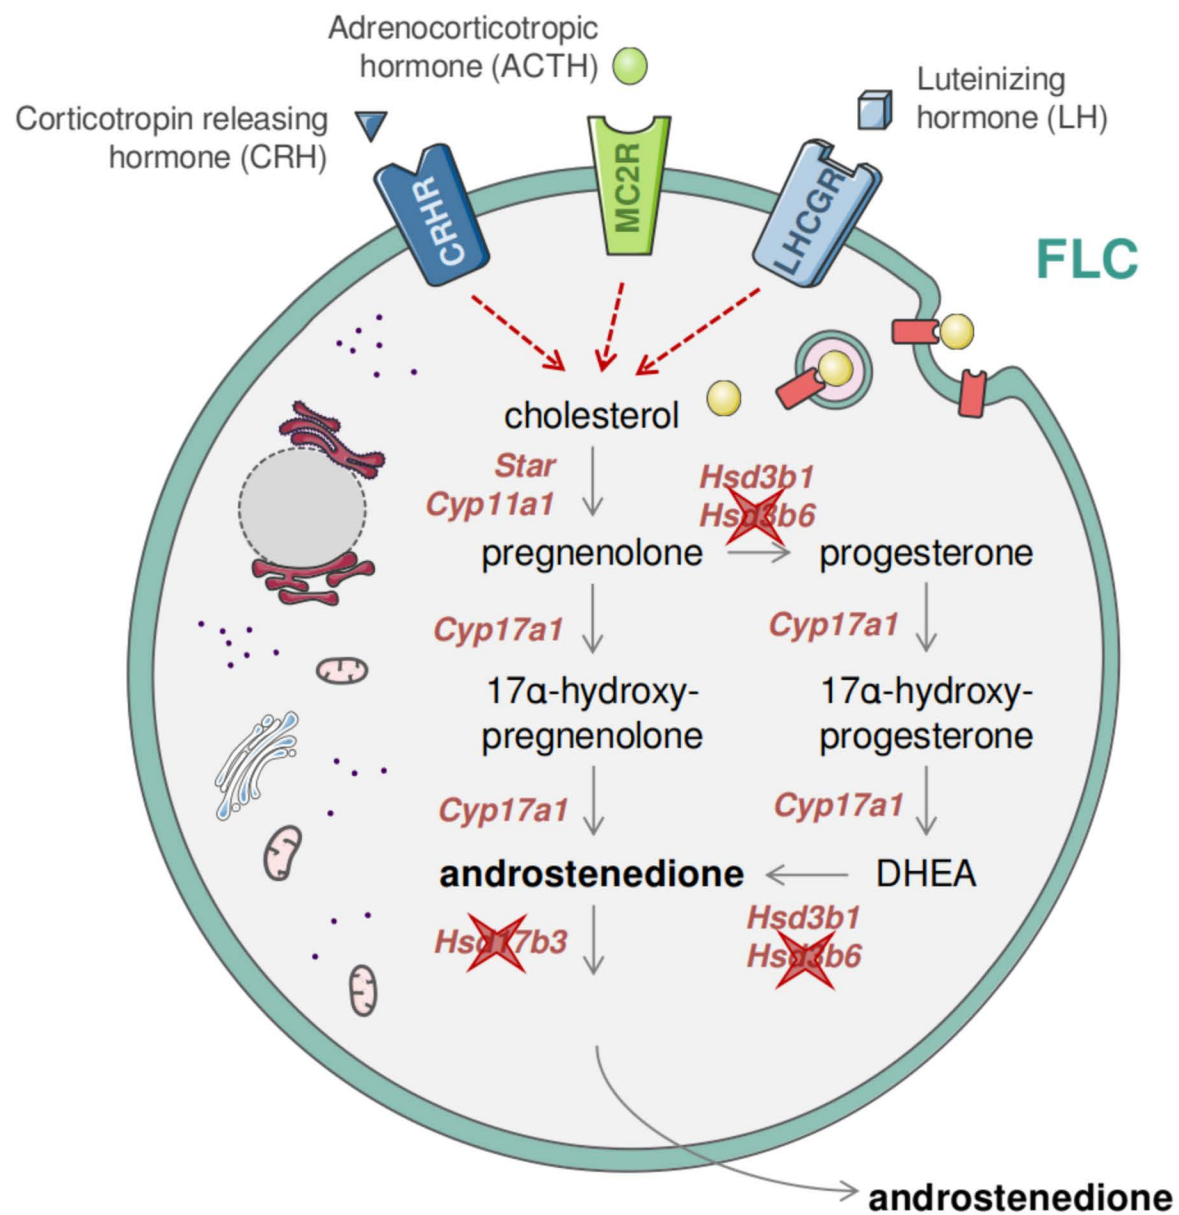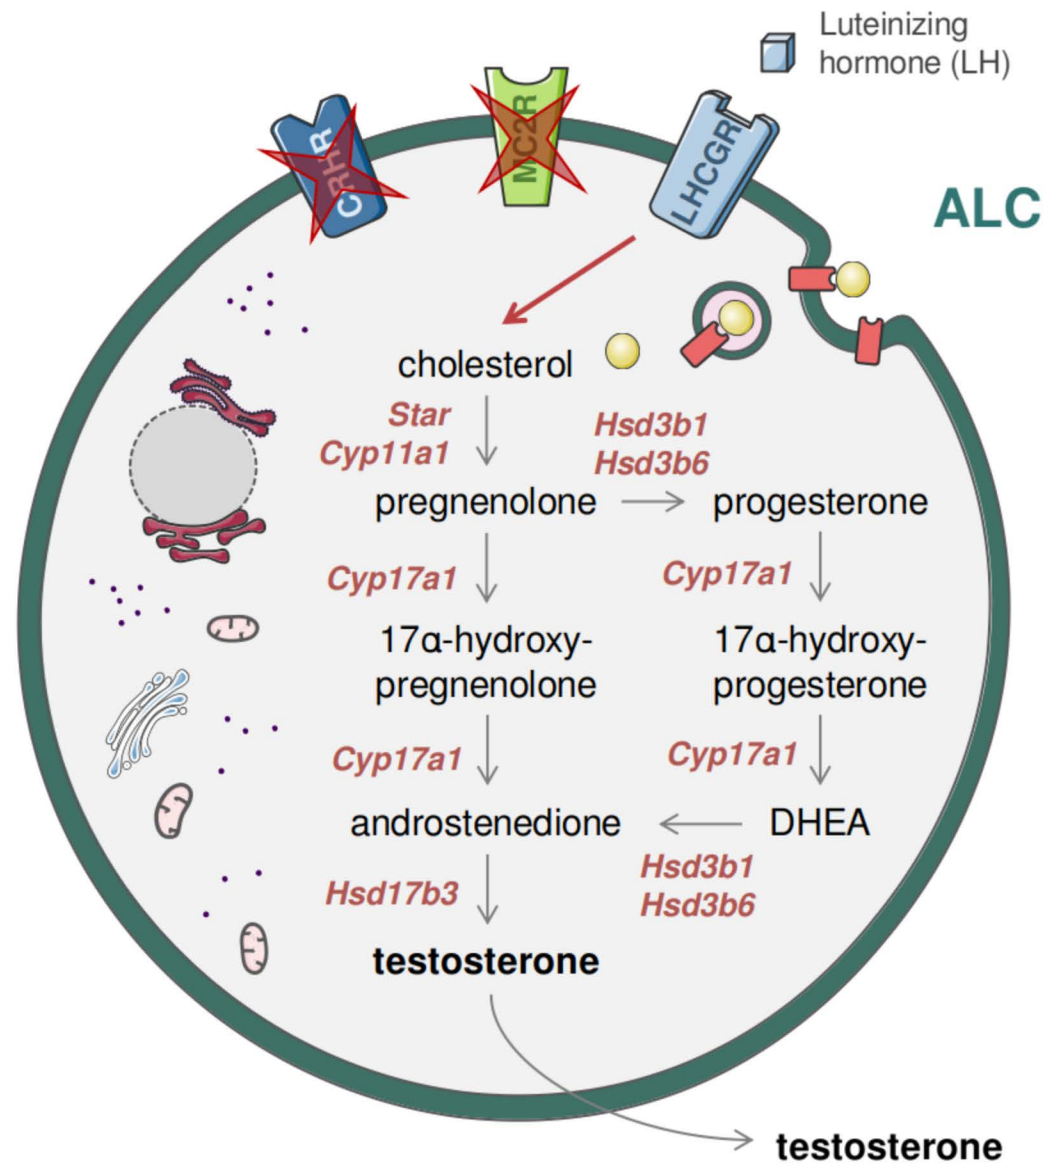

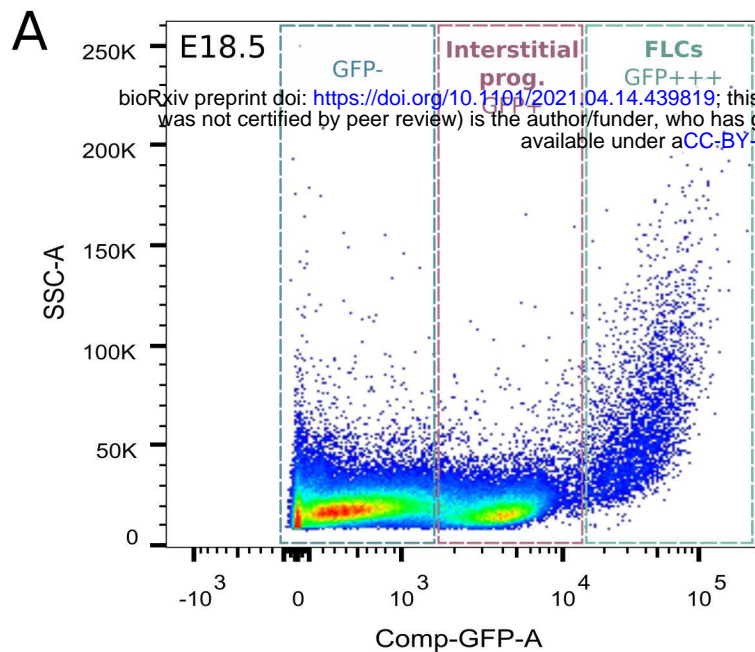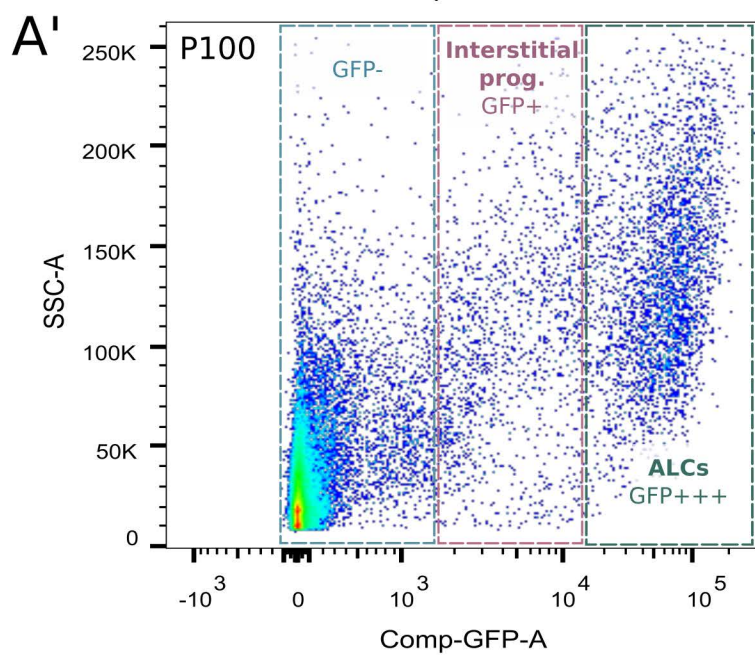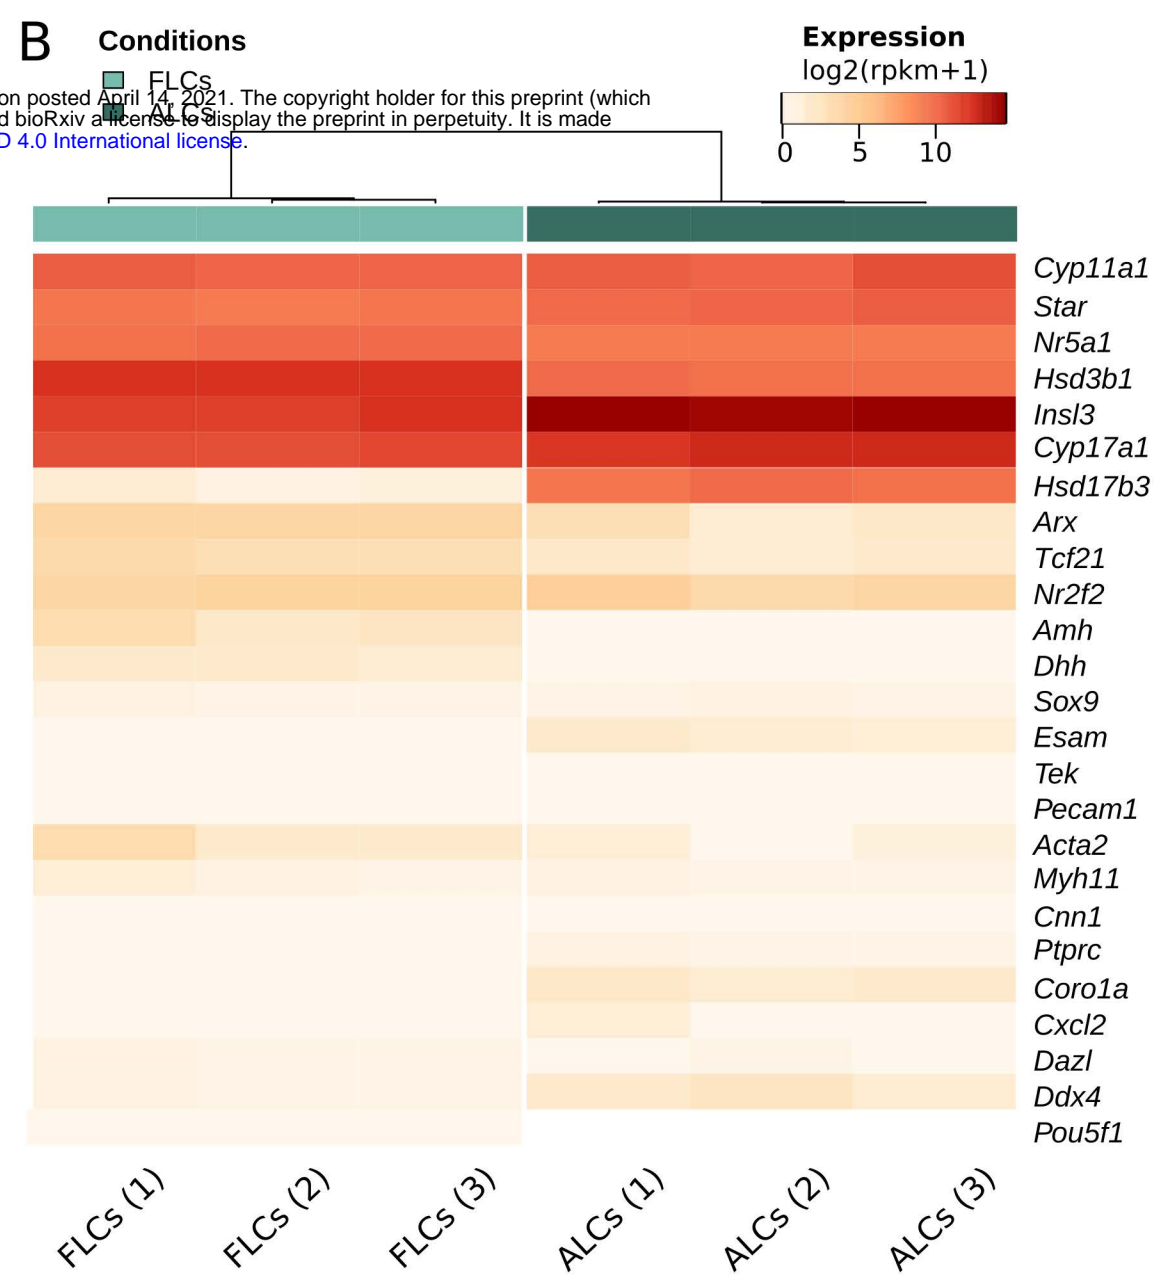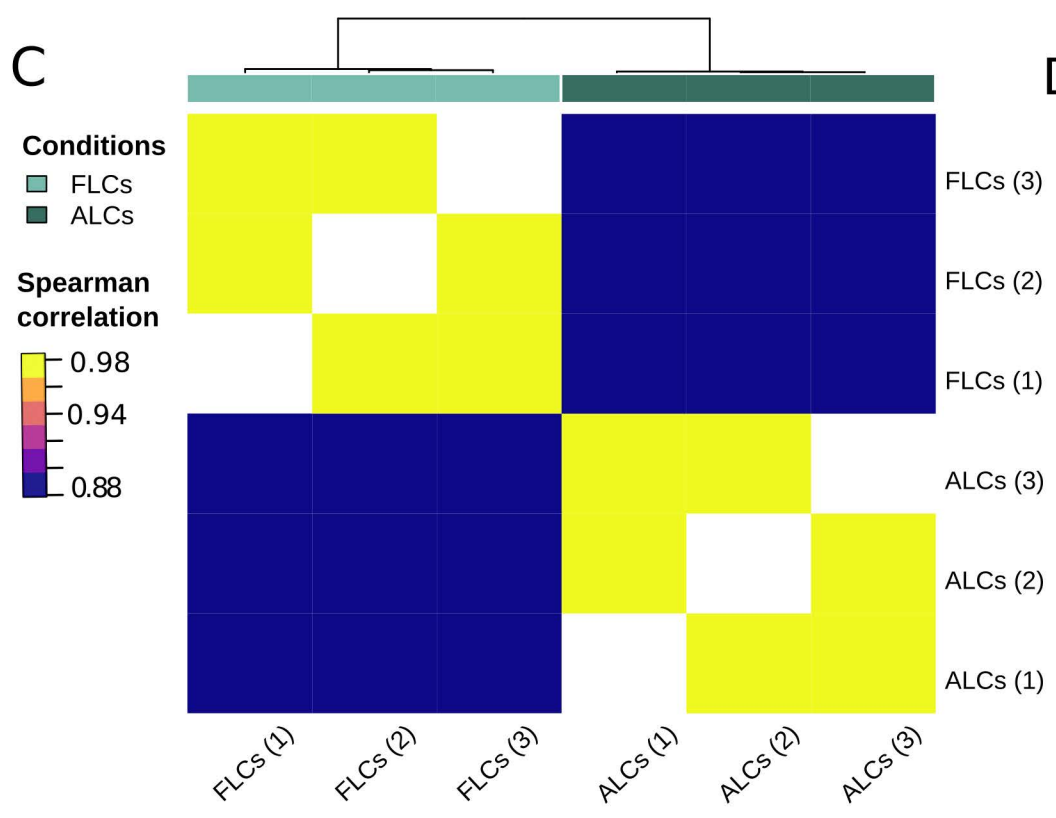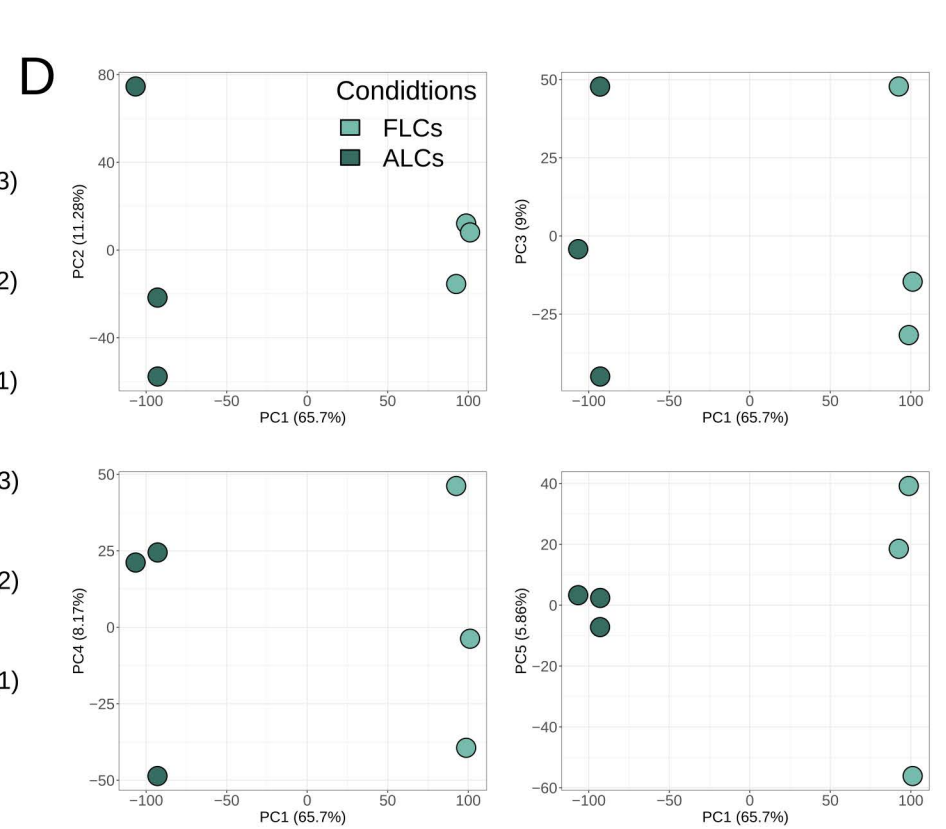



Mouse Fetal Testis

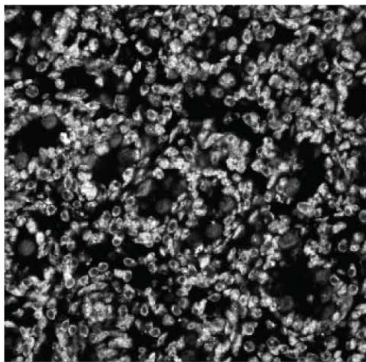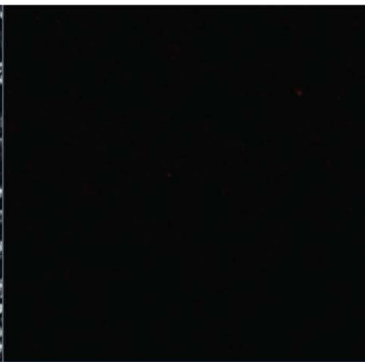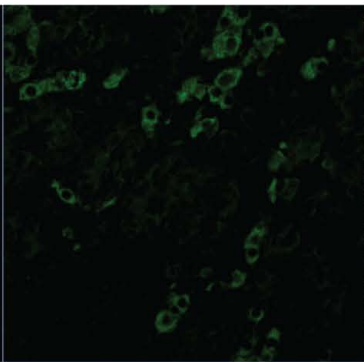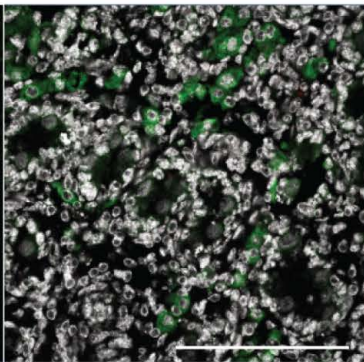

Mouse Adult Testis

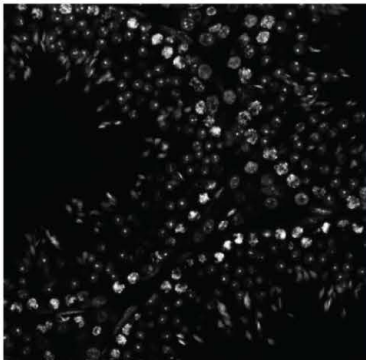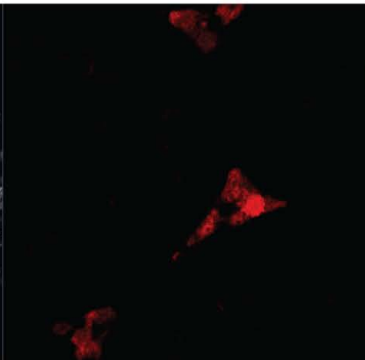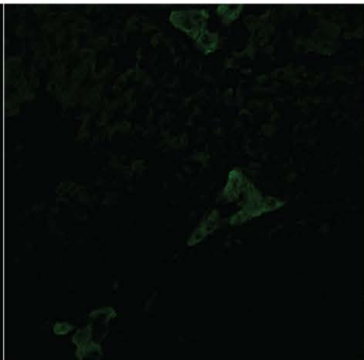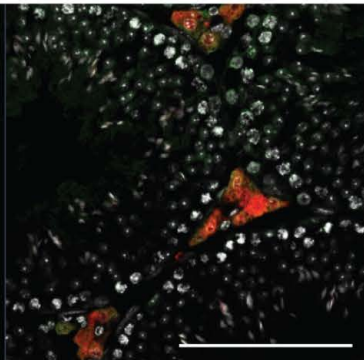

HSD3B BHMT DNA
